# Supplementary material for: PEP-CoV protocol: a PEP flute-self-care randomised controlled trial to prevent respiratory deterioration and hospitalisation in early COVID-19
Source: PubMed Central journal article supplement — BMJ Open. 2021 Jun 30;11(6):e050582. doi: 10.1136/bmjopen-2021-050582 (PMC8249175; doi:10.1136/bmjopen-2021-050582), 2021-06-30
Supplement: bmjopen-2021-050582.draft_revisions.pdf [file bmjopen-2021-050582.draft_revisions.pdf]

# BMJ Open

BMJ Open is committed to open peer review. As part of this commitment we make the peer review history of every article we publish publicly available.

When an article is published we post the peer reviewers' comments and the authors' responses online. We also post the versions of the paper that were used during peer review. These are the versions that the peer review comments apply to.

The versions of the paper that follow are the versions that were submitted during the peer review process. They are not the versions of record or the final published versions. They should not be cited or distributed as the published version of this manuscript.

BMJ Open is an open access journal and the full, final, typeset and author-corrected version of record of the manuscript is available on our site with no access controls, subscription charges or pay-per-view fees (<http://bmjopen.bmj.com>).

If you have any questions on BMJ Open's open peer review process please email [info.bmjopen@bmj.com](mailto:info.bmjopen@bmj.com)

# BMJ Open

## The PEP-CoV protocol: a PEP flute-selfcare randomised controlled trial to prevent respiratory deterioration and hospitalisation among SARS-CoV-2 infected individuals with Covid-19 symptoms

|                               |                                                                                                                                                                                                                                                                                                                                                                                                                                                                                                                                                                                                                                                                                                                                                                                                                                                                                                                                                                                                 |
|-------------------------------|-------------------------------------------------------------------------------------------------------------------------------------------------------------------------------------------------------------------------------------------------------------------------------------------------------------------------------------------------------------------------------------------------------------------------------------------------------------------------------------------------------------------------------------------------------------------------------------------------------------------------------------------------------------------------------------------------------------------------------------------------------------------------------------------------------------------------------------------------------------------------------------------------------------------------------------------------------------------------------------------------|
| Journal:                      | <i>BMJ Open</i>                                                                                                                                                                                                                                                                                                                                                                                                                                                                                                                                                                                                                                                                                                                                                                                                                                                                                                                                                                                 |
| Manuscript ID                 | bmjopen-2021-050582                                                                                                                                                                                                                                                                                                                                                                                                                                                                                                                                                                                                                                                                                                                                                                                                                                                                                                                                                                             |
| Article Type:                 | Protocol                                                                                                                                                                                                                                                                                                                                                                                                                                                                                                                                                                                                                                                                                                                                                                                                                                                                                                                                                                                        |
| Date Submitted by the Author: | 01-Mar-2021                                                                                                                                                                                                                                                                                                                                                                                                                                                                                                                                                                                                                                                                                                                                                                                                                                                                                                                                                                                     |
| Complete List of Authors:     | Mollerup, Annette; Copenhagen University Hospital, The Parker Institute, Frederiksberg<br>Larsen, Sofus; Copenhagen University Hospital, The Parker Institute, Frederiksberg<br>Bennetzen, Anita; Copenhagen University Hospital, The Parker Institute, Frederiksberg<br>Henriksen, Marius; Copenhagen University Hospital, The Parker Institute, Frederiksberg<br>Simonsen, Mette; Copenhagen University Hospital, Department of Neuro-Medicine, Bispebjerg<br>Weis, Nina; Copenhagen University Hospital, Department of Infectious Diseases, Hvidovre; University of Copenhagen, Department of Clinical Medicine, Faculty of Health and Medical Science<br>Kofod, Linette; Copenhagen University Hospital, Department of Physio- and Occupational Therapy and PMR-C, Hvidovre<br>Heitmann, Berit; Copenhagen University Hospital, The Parker Institute, Research Unit for Dietary Studies, Frederiksberg; University of Copenhagen, Section for General Practice, Department of Public Health |
| Keywords:                     | COVID-19, PREVENTIVE MEDICINE, PUBLIC HEALTH, RESPIRATORY MEDICINE (see Thoracic Medicine), Clinical trials < THERAPEUTICS, INFECTIOUS DISEASES                                                                                                                                                                                                                                                                                                                                                                                                                                                                                                                                                                                                                                                                                                                                                                                                                                                 |
|                               |                                                                                                                                                                                                                                                                                                                                                                                                                                                                                                                                                                                                                                                                                                                                                                                                                                                                                                                                                                                                 |

SCHOLARONE™  
Manuscripts

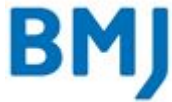

I, the Submitting Author has the right to grant and does grant on behalf of all authors of the Work (as defined in the below author licence), an exclusive licence and/or a non-exclusive licence for contributions from authors who are: i) UK Crown employees; ii) where BMJ has agreed a CC-BY licence shall apply, and/or iii) in accordance with the terms applicable for US Federal Government officers or employees acting as part of their official duties; on a worldwide, perpetual, irrevocable, royalty-free basis to BMJ Publishing Group Ltd ("BMJ") its licensees and where the relevant Journal is co-owned by BMJ to the co-owners of the Journal, to publish the Work in this journal and any other BMJ products and to exploit all rights, as set out in our [licence](#).

The Submitting Author accepts and understands that any supply made under these terms is made by BMJ to the Submitting Author unless you are acting as an employee on behalf of your employer or a postgraduate student of an affiliated institution which is paying any applicable article publishing charge ("APC") for Open Access articles. Where the Submitting Author wishes to make the Work available on an Open Access basis (and intends to pay the relevant APC), the terms of reuse of such Open Access shall be governed by a Creative Commons licence – details of these licences and which [Creative Commons](#) licence will apply to this Work are set out in our licence referred to above.

Other than as permitted in any relevant BMJ Author's Self Archiving Policies, I confirm this Work has not been accepted for publication elsewhere, is not being considered for publication elsewhere and does not duplicate material already published. I confirm all authors consent to publication of this Work and authorise the granting of this licence.

**Title:**

The PEP-CoV protocol: a PEP flute-selfcare randomised controlled trial to prevent respiratory deterioration and hospitalisation among SARS-CoV-2 infected individuals with Covid-19 symptoms

**Corresponding Author:**

Annette Mollerup

The Parker Institute

Copenhagen University Hospital Bispebjerg-Frederiksberg

Nordre Fasanvej 57, Vej 8, Indgang 11

2000 Frederiksberg, Denmark

+45 38 16 31 02

E-mail: [annette.mollerup@regionh.dk](mailto:annette.mollerup@regionh.dk)

**Authors:**

Annette Mollerup<sup>1</sup>, Sofus C. Larsen<sup>1</sup>, Anita S. Bennetzen<sup>1</sup>, Marius Henriksen<sup>1</sup>, Mette K. Simonsen<sup>1,2</sup>, Nina Weis<sup>3,4</sup>, Linette M. Kofod<sup>5</sup>, Berit L. Heitmann<sup>1,6</sup>

<sup>1</sup>The Parker Institute, Copenhagen University Hospital Bispebjerg-Frederiksberg, Denmark

<sup>2</sup>Department of Neurology, Copenhagen University Hospital Bispebjerg-Frederiksberg, Denmark

<sup>3</sup>Department of Infectious Diseases, Copenhagen University Hospital Hvidovre, Denmark

<sup>4</sup>Department of Clinical Medicine, Faculty of Health and Medical Science, University of Copenhagen, Denmark

<sup>5</sup>Department of Physio- and Occupational Therapy and PMR-C, Copenhagen University Hospital Hvidovre, Denmark

<sup>6</sup>Section for General Practice, Department of Public Health, University of Copenhagen, Denmark

**Word count: 4225**

**Keywords:** SARS-CoV-2 infection, Covid-19, selfcare, public health, randomised controlled trial

## ABSTRACT

### The PEP-CoV protocol: a PEP flute-selfcare randomised controlled trial to prevent respiratory deterioration and hospitalisation in Covid-19

#### Introduction

Infection with severe acute respiratory syndrome Corona Virus 2 (SARS-CoV-2) may progress to severe pulmonary disease Covid-19. Currently, patients admitted to hospital because of Covid-19 have better prognosis than during the first period of the pandemic due to improved treatment. However, the overall societal susceptibility of being infected makes it pivotal to prevent severe courses of disease to avoid high mortality rates and collapse of the health care systems. Positive expiratory pressure (PEP) selfcare is used in chronic pulmonary disease and has been shown to prevent pneumonia in a high-risk cohort of leukaemia patients. The PEP-CoV trial examines the effectiveness on respiratory symptoms and need of hospital admission by regular PEP flute-use among non-hospitalised individuals with confirmed SARS-CoV-2 infection and Covid-19 symptoms.

#### Methods and analysis

In this randomised controlled trial, we hypothesise that daily PEP flute usage as add-on to usual care is superior to usual care as regards symptom severity measured by the COPD Assessment Test (CAT) at 30-day follow-up (primary outcome) and hospital admission through register data (secondary outcome). We expect to recruit 400 individuals for the trial. Participants in the intervention group receive a kit of 2 PEP flutes and adequate resistances and access to instruction videos. A telephone hotline offers possible contact to a nurse. The 8-item CAT-score measures cough, sputum, chest pain, dyspnoea, activities of daily living at home, feeling safe at home despite symptoms, sleep quality and vigour. The CAT-score is measured daily in both intervention and control arms by surveys prompted through text messages.

#### Ethics and dissemination

The study was registered prospectively at [www.clinicaltrials.gov](http://www.clinicaltrials.gov) on August 27, 2020 (NCT04530435). Ethical approval was granted by the local Health Research Ethics Committee (Journal number: H-20035929) July 23, 2020. Enrolment of participants began October 6, 2020. Results will be published in scientific journals.

#### Keywords

SARS-CoV-2 infection, Covid-19, selfcare, public health, randomised controlled trial

## ARTICLE SUMMARY

### Strengths and limitations of this study

- Using a randomised design, this study addresses an important evidence gap in the SARS-CoV-2 pandemic; how to mobilise the individual's selfcare to prevent respiratory deterioration in Covid-19 with the use of a simple, cheap and accessible intervention, thus potentially avoid hospitalisation.
- This study is a niche project between a public health intervention and disease prevention in a clinical setting which may challenge a warranted non-selective recruitment as recruitment awaits the initiative from eligible participants.
- Due to the type of intervention, blinding of the participants and treatment providers is not feasible.
- Covid-19 is a novel disease and this study is explorative when using self-reported measurements from COPD-treatment i.e. the CAT-score as an outcome variable. In the absence of objectively measured values like oxygen saturation or body temperature as outcome variables, this calls for attention when discussing the results of the trial.
- There is a risk of contamination across arms as participants can acquire the PEP flute as over-the-counter medical equipment.

1  
2  
3  
4  
5  
6  
7  
8  
9  
10  
11  
12  
13  
14  
15  
16  
17  
18  
19  
20  
21  
22  
23  
24  
25  
26  
27  
28  
29  
30  
31  
32  
33  
34  
35  
36  
37  
38  
39  
40  
41  
42  
43  
44  
45  
46  
47  
48  
49  
50  
51  
52  
53  
54  
55  
56  
57  
58  
59  
60

## INTRODUCTION

The pandemic infection with severe acute respiratory syndrome Corona Virus 2 (SARS-CoV-2) may result in non-specific symptoms like fever, fatigue and dyspnoea or it may progress to severe pulmonary disease Corona Virus Disease 2019 (Covid-19). Mid-January 2021 as reported by WHO, the worldwide number of people dying because of Covid-19 exceeded two million. Over time, we learn more about this new disease e.g. reports of a median time from symptom onset to development of pneumonia of approximately 5 days[1]. Covid-19 seems to damage the respiratory system due to an overreaction of the immune system with individual risk profiles of age and comorbidity[2]. This may lead to acute respiratory distress syndrome (ARDS) and in these cases, the median time from symptom onset to severe hypoxemia and intensive care unit (ICU) admission has been reported to be approximately 7-12 days[1]. At a median follow-up period of 79 days among ICU-patients, mortality was reported to be 37 % in a Danish nationwide study. Hence, the Covid-19 disease burdens the health care systems even in countries without any restrictions as to ICU-admission in times of a pandemic[3].

At present, the disease trajectory is not easy to predict[1], and little is known of any measures or medication to alter the course of early-stage disease i.e. to prevent the need of hospitalisation and critical care. The PEP-CoV trial will investigate the effect of PEP flute-selfcare on respiratory deterioration and hospital admission among non-hospitalised individuals with Covid-19 symptoms. If PEP flute-selfcare proves to be effective, it will be easy to implement as a public health intervention also in a global context. In the trial, participants have confirmed SARS-CoV-2 infection by positive PCR swab test and Covid-19 symptoms at study entry hence, although no medical examination has been conducted, they are considered to be Covid-19 cases according to WHO Covid-19 case definitions[4].

### Background and rationale

Recent evidence suggests a poor prognosis whenever the Covid-19 disease has become so severe that hospital admission is needed. A large observational cohort study from UK found that within a minimal follow-up time of two weeks 26 % of patients admitted to acute care hospitals had died[5]. Among patients in need of critical care facilities and/or receiving mechanical ventilation, the proportion of fatal outcome was 32 % and 37 % respectively. In the pandemic waves, health care systems face an imminent threat of collapse because of an overload of Covid-19 cases. The prognosis of having a severe course of disease due to Covid-19 is better now than in the first period of the pandemic because of improvements in treatment. Antiviral treatment with remdesivir[6] and dexamethasone[7] appears to have moderate effects. However, both treatments are administered only in cases when the patient is hospitalised and in need of oxygen. In the overall population, all are at risk of being infected and this overall societal susceptibility makes prevention of severe courses of disease pivotal to the health care system.

1  
2  
3  
4 A variety of symptoms have been observed in patients with Covid-19. The study by Docherty et al. refers to  
5 clusters of symptoms on admission i.e. musculoskeletal symptoms (myalgia, joint pain, headache, and  
6 fatigue); enteric symptoms (abdominal pain, vomiting, and diarrhoea); and a mucocutaneous cluster[5].  
7 However, the most common symptom cluster involves respiratory symptoms i.e. cough, sputum and  
8 shortness of breath, accompanied by fever. When critically ill, the intensive care treatment includes  
9 mechanical ventilation with high oxygenation and positive end expiratory pressure (PEEP). PEEP increases  
10 functional residual capacity and reduces the work of breathing. The use of positive expiratory pressure has  
11 been highlighted as very important measures to avoid a critical course administered as continuous positive  
12 airway pressure (CPAP) by face masks[8] or by use of a helmet[9]. However, this treatment is for  
13 hospitalised patients. Positive expiratory pressure (PEP) is used in selfcare in chronic inflammatory  
14 pulmonary diseases like chronic obstructive pulmonary disease (COPD) as an airway clearance technique  
15 (ACT) because of the possible beneficial effects on lung function. ACT appears to be safe and the PEP flute  
16 has been shown to be as effective as other ACTs[10]. However, little is known of the potential effects of PEP  
17 flute other than those related to COPD. In one small randomised controlled trial (RCT) among patients with  
18 acute myeloid leukaemia, lung training with PEP flute at least twice daily alongside daily spirometry was  
19 superior to daily spirometry only in preventing pneumonia[11]. The trial reported 25 incidences of X-ray-  
20 verified pneumonia throughout the study period affecting six patients from the intervention group with daily  
21 PEP-training and 17 patients from the control group. The difference in first pneumonia incidence between  
22 intervention versus control group was significant with an incidence per 1000 days of 2.17 versus 6.52  
23 respectively ( $p = 0.021$ ). The authors suggested a causal effect of mechanically supported inflation of the  
24 alveoli and loosening of secretions by PEP use, that may have prevented atelectasis and lower tract infection  
25 and concluded, that in this high-risk cohort of patients progression to manifest x-ray-verified lung infiltrates  
26 were hindered by PEP flute use without any adverse events[11].  
27  
28  
29  
30  
31  
32  
33  
34  
35  
36  
37  
38  
39  
40

41 Most current research on SARS-CoV-2 and Covid-19 relates to screening measures, vaccine development  
42 and optimising hospital treatment i.e. the bottom and top ends of a pyramid which depicts the relationship  
43 between populational size, setting and treatment options (Fig. 1). It is likely that we have this pandemic for  
44 several years until we have reached a high level of immunity in the population either by natural spread of the  
45 disease or via an efficient vaccination programme and measures are needed to help the SARS-CoV-2  
46 infected individual at home to overcome the course of disease with less symptoms and strain. Based on the  
47 hypothesis that the regular use of a PEP flute may prevent the progression of respiratory symptoms in non-  
48 hospitalised individuals with SARS-CoV-2 infection, a PEP flute intervention, feasible for home use, may  
49 prevent prolonged disease courses, long-term sequelae and costly hospital admissions.  
50  
51  
52  
53  
54  
55

56 > Insert Figure 1 <  
57  
58  
59  
60



1  
2  
3  
4  
5  
6  
7  
8  
9  
10  
11  
12  
13  
14  
15  
16  
17  
18  
19  
20  
21  
22  
23  
24  
25  
26  
27  
28  
29  
30  
31  
32  
33  
34  
35  
36  
37  
38  
39  
40  
41  
42  
43  
44  
45  
46  
47  
48  
49  
50  
51  
52  
53  
54  
55  
56  
57  
58  
59  
60

## **Study objectives and hypotheses**

The aim of the present study is to explore the effectiveness on respiratory symptoms by regular use of PEP among SARS-CoV-2 infected, non-hospitalised individuals with Covid-19 symptoms. The primary objective is to examine the effect of PEP flute use on self-reported change in COPD Assessment Test (CAT) score during 30 days of follow-up. We hypothesise that PEP flute use has positive effects on self-reported respiratory symptoms such as dyspnoea, coughing and perceived mucus clearance through beneficial effects on lung function and airway clearance. Secondly, we expect a lower rate of hospitalisation and use of antibiotics in the intervention group as compared to the usual care group, the latter in case of a bacterial superinfection.

## **METHODS**

### **Trial design and setting**

The PEP-CoV trial is designed as a randomised, controlled, open-label trial with two parallel groups and consecutive inclusion. The trial is investigator-initiated and hosted by the Parker Institute, a part of Copenhagen University Hospital Bispebjerg-Frederiksberg. The participants are recruited from the Capital Region and Region Zealand in Denmark (in total, approximately 2.7 million citizens). The trial registration data set is displayed in Table 1.

### **Patient and Public Involvement**

Ideation of the trial intervention was based upon anecdotal evidence of a PEP flute's beneficial effects in a single case of Covid-19. Personal communication with Covid-19 convalescents has contributed to the designing process of the study. However, due to the ongoing pandemic crisis further patient and public involvement in the research process has not been feasible.

Table 1

| <b>Table 1 WHO trial registration data set</b> |                                                                                                                                                                                                                                                                                                                                                                                                                                                                                                                                                                                                                                                                                                                                                                                                                                                                                                                               |
|------------------------------------------------|-------------------------------------------------------------------------------------------------------------------------------------------------------------------------------------------------------------------------------------------------------------------------------------------------------------------------------------------------------------------------------------------------------------------------------------------------------------------------------------------------------------------------------------------------------------------------------------------------------------------------------------------------------------------------------------------------------------------------------------------------------------------------------------------------------------------------------------------------------------------------------------------------------------------------------|
| <b>Data category</b>                           | <b>Information</b>                                                                                                                                                                                                                                                                                                                                                                                                                                                                                                                                                                                                                                                                                                                                                                                                                                                                                                            |
| Primary registry and trial identifying number  | ClinicalTrials.gov NCT04530435                                                                                                                                                                                                                                                                                                                                                                                                                                                                                                                                                                                                                                                                                                                                                                                                                                                                                                |
| Date of registration in primary registry       | 27 august, 2020                                                                                                                                                                                                                                                                                                                                                                                                                                                                                                                                                                                                                                                                                                                                                                                                                                                                                                               |
| Secondary identifying numbers                  | Danish Data Protection Agency (P-2020-879)<br>Health Research Ethics (H-20035929)                                                                                                                                                                                                                                                                                                                                                                                                                                                                                                                                                                                                                                                                                                                                                                                                                                             |
| Sources of monetary or material support        | The Danish Innovation Fund (0211-00023B) and the Danish Nursing Council (grant number: n/a)                                                                                                                                                                                                                                                                                                                                                                                                                                                                                                                                                                                                                                                                                                                                                                                                                                   |
| Sponsor                                        | The Parker Institute, Copenhagen, Denmark                                                                                                                                                                                                                                                                                                                                                                                                                                                                                                                                                                                                                                                                                                                                                                                                                                                                                     |
| Contact for public queries                     | Annette Mollerup, PhD (annette.mollerup@regionh.dk)<br>The Parker Institute<br>Copenhagen University Hospital Bispebjerg-Frederiksberg<br>Ndr. Fasanvej 57, 2000 Frederiksberg, Denmark<br>+45 38163102                                                                                                                                                                                                                                                                                                                                                                                                                                                                                                                                                                                                                                                                                                                       |
| Contact for scientific queries                 | Annette Mollerup, PhD (annette.mollerup@regionh.dk)                                                                                                                                                                                                                                                                                                                                                                                                                                                                                                                                                                                                                                                                                                                                                                                                                                                                           |
| Public title                                   | Covid-19: symptoms and respiratory selfcare [in Danish: COVID-19 sygdom: symptomer og vejtrækningsøvelser]                                                                                                                                                                                                                                                                                                                                                                                                                                                                                                                                                                                                                                                                                                                                                                                                                    |
| Scientific title                               | PEP flute-selfcare to prevent respiratory deterioration and hospitalisation among Covid-19 patients: a randomised trial (acronym: The PEP-CoV trial)                                                                                                                                                                                                                                                                                                                                                                                                                                                                                                                                                                                                                                                                                                                                                                          |
| Countries of recruitment                       | Denmark                                                                                                                                                                                                                                                                                                                                                                                                                                                                                                                                                                                                                                                                                                                                                                                                                                                                                                                       |
| Health condition(s)                            | Adults aged 18 or older with a positive SARS-CoV-2 test and symptoms of COVID-19                                                                                                                                                                                                                                                                                                                                                                                                                                                                                                                                                                                                                                                                                                                                                                                                                                              |
| Intervention                                   | Active comparator: daily use of PEP flute and daily self-monitoring of symptoms for 30 days as add-on to usual care<br>Comparator: daily self-monitoring of symptoms and usual care as recommended by the Danish Health Authorities (self-quarantine, sufficient intake of liquid especially in case of high body temperature, over-the-counter symptom relieving medication)                                                                                                                                                                                                                                                                                                                                                                                                                                                                                                                                                 |
| Key inclusion and exclusion criteria           | Inclusion criteria:<br>1. Aged 18 years or older<br>2. Positive SARS-CoV-test<br>3. Symptoms of Covid-19 according to the COVIDmeter; at least one respiratory symptom (cough, sneezing, shortness of breath, chest pain, running nose) and one general symptom<br>4. Access to use a smartphone<br>5. Can reply to a questionnaire in Danish (sent on email, text-message or via telephone interview) as assessed by the investigator<br>6. Given informed consent<br>Exclusion criteria:<br>1. Any condition or impairment that, in the opinion of the investigator, makes a potential participant unsuitable for participation or which obstruct participation, such as psychiatric disorders, individuals, habitually using a PEP flute, participation in other clinical Covid-trials or persons living in the same household as existing participants in the trial<br>2. Hospitalized patients or nursing home residents |
| Study type                                     | Interventional, open-label trial with randomisation to two parallel groups<br>Primary purpose: prevention of respiratory deterioration of symptoms and hospitalisation                                                                                                                                                                                                                                                                                                                                                                                                                                                                                                                                                                                                                                                                                                                                                        |
| Data of first enrollment                       | October 2020                                                                                                                                                                                                                                                                                                                                                                                                                                                                                                                                                                                                                                                                                                                                                                                                                                                                                                                  |
| Target sample size                             | 400                                                                                                                                                                                                                                                                                                                                                                                                                                                                                                                                                                                                                                                                                                                                                                                                                                                                                                                           |
| Recruitment status                             | Recruiting                                                                                                                                                                                                                                                                                                                                                                                                                                                                                                                                                                                                                                                                                                                                                                                                                                                                                                                    |
| Primary outcome                                | Day 30 COPD Assessment Test score (CAT-score) (modified for the present study)                                                                                                                                                                                                                                                                                                                                                                                                                                                                                                                                                                                                                                                                                                                                                                                                                                                |
| Key secondary outcomes                         | 1. Hospital admissions on Day 30, Day 90 and Day 180<br>2. Use of antibiotics in case of superinfection<br>3. Number of participants with serious adverse events (SAE) during the 30-day intervention period<br>4. Compliance assessment                                                                                                                                                                                                                                                                                                                                                                                                                                                                                                                                                                                                                                                                                      |

PEP, positive expiratory pressure; COVID-meter, the Danish Health Authority surveillance of symptoms reported by the public to a designated website; CAT, COPD Assessment Tool consisting of eight items on a scale from 0-5: cough, sputum, chest pain, dyspnoea, activities of daily living at home, feeling safe at home despite symptoms (because of actual self-quarantine, modified for the present study from feeling safe at leaving home despite symptoms), sleep quality and vigour

The study duration is six months and the primary endpoint is CAT-score after 30 days of active intervention. Follow-ups of CAT-scores are also planned at 90- and 180-days post-baseline. The study's enrolment, intervention and assessments schedules according to SPIRIT Guidelines[12] are outlined in Table 2.

Table 2

| Table 2 Schedule for study enrolment, intervention and assessments |                               |                |                             |                             |                              |
|--------------------------------------------------------------------|-------------------------------|----------------|-----------------------------|-----------------------------|------------------------------|
| Activity/assessment                                                | Recruitment                   | Enrolment      | Follow-up <sub>30days</sub> | Follow-up <sub>90days</sub> | Follow-up <sub>180days</sub> |
| Time point                                                         | T <sub>-1</sub>               | T <sub>0</sub> | T <sub>1</sub>              | T <sub>2</sub>              | T <sub>3</sub>               |
| Pre-screening (positive PCR-test)                                  | x                             |                |                             |                             |                              |
| Information to e-Boks                                              | x                             |                |                             |                             |                              |
| Informed e-consent                                                 |                               | x              |                             |                             |                              |
| Eligibility screening                                              |                               | x              |                             |                             |                              |
| Baseline questionnaire                                             |                               | x              |                             |                             |                              |
| Randomisation/group allocation                                     |                               | x              |                             |                             |                              |
| Video guides                                                       |                               | x              |                             |                             |                              |
| PEP flute deliverance                                              |                               | x (+3 days)    |                             |                             |                              |
| Self-report of symptoms CAT                                        |                               | x (+1 day)     | x (day 30)                  |                             |                              |
| Intervention group: PEP-usage                                      |                               | x (+1 day)     | x (day 30)                  |                             |                              |
| Compliance assessment                                              |                               | x (+1 day)     | x (day 30)                  |                             |                              |
| Outcome assessment                                                 |                               |                | x                           | x                           | x                            |
| <b>Baseline/outcome variables*</b>                                 |                               |                |                             |                             |                              |
| Age, sex (register data)                                           | x                             |                |                             |                             |                              |
| Symptoms within last week                                          |                               | x              | x                           | x                           | x                            |
| Cohabitation                                                       |                               | x              |                             |                             |                              |
| Education                                                          |                               | x              |                             |                             |                              |
| Health literacy (two dimensions)                                   |                               | x              |                             |                             |                              |
| Profession, employment                                             |                               | x              |                             |                             |                              |
| Self-rated health (one item)                                       |                               | x              | x                           | x                           | x                            |
| Weight, height                                                     |                               | x              |                             |                             |                              |
| Smoking, alcohol                                                   |                               | x              |                             |                             |                              |
| Comorbidity self-reported                                          |                               | x              |                             |                             |                              |
| Comorbidity (register data)                                        |                               |                | x                           |                             |                              |
| CAT-score                                                          |                               | x              | x                           | x                           | x                            |
| Hospital admission (register data)                                 |                               |                | x                           |                             | x                            |
| Medication (register data)                                         |                               |                | x                           |                             | x                            |
| Death (register data)                                              |                               |                | x                           |                             | x                            |
| Serious adverse event                                              | As needed throughout protocol |                |                             |                             |                              |

\*All baseline and outcome variables are collected as questionnaire data unless stated otherwise

### Trial population and eligibility criteria

To avoid unnecessary spread of the SARS-CoV-2, any contact i.e. oral information, consent and screening is provided over phone and by use of secured electronic communication via the public 'Digital Post' system (electronic mailbox for letters from Danish authorities) administered by the platform 'e-Boks' (<https://www.e-boks.com/danmark/en>). This system is linked to the individual's Personal Identification number – a national identification number, which is part of the personal information stored in the Danish Civil Registration System. Daily information of positive results from the SARS-CoV-2 PCR-tests are provided from the Departments of Microbiology at Copenhagen University Hospitals Rigshospitalet, Hvidovre Hospital and Herlev Hospital, which covers the overall Capital Region, and the Department of Microbiology, Slagelse Hospital, covering the entire Region Zealand. Based upon these data, individuals eligible for study participation receive study information and invitation electronically via e-Boks. The individual may then contact the project directly via e-mail or phone or leave a phone number for a subsequent call from the data collectors (AM and ASB).

1  
2  
3  
4 The inclusion/exclusion criteria for the trial are described in Table 1. A variety of symptoms has been  
5 associated to Covid-19[5,13] and early Danish reports indicated that the most frequent self-reported  
6 respiratory symptoms in Covid-19 (n = 308) were cough (71%) and shortness of breath (54 %)[14].  
7 However, recent findings have suggested that approximately three quarters of people with SARS-CoV-2  
8 infection are asymptomatic on the day of the test[15]. As the rationale for the potential effect of a PEP flute  
9 in a course of SARS-CoV-2 infection and Covid-19 involves the progression of respiratory symptoms, at  
10 least one reported respiratory symptom is required at enrolment. A screening manual has been developed and  
11 questions of symptoms according to the COVIDmeter[16] are posed after given consent (Table 2).  
12  
13  
14  
15  
16

### 17 **Randomisation and blinding**

18  
19  
20 The participants reply to a telephone-administered baseline questionnaire before randomisation.  
21 Subsequently, the participant is randomly allocated to treatment or control arm using an appropriate  
22 statistical software embedded in REDCap, an online web-based clinical trial management application  
23 (Vanderbilt University, Nashville, TN, USA)[17]. The computer-generated random allocation is then  
24 unknown to the investigator and data collectors. As mortality prognosis to Covid-19 is higher in men and  
25 elderly[5], the allocation is based upon permuted random blocks and 1:1 stratified for the conditions sex and  
26 age (< 60 and ≥ 60 years). Sex is determined through the unique Danish personal identification number as a  
27 binary variable.  
28  
29  
30  
31  
32

33 As this is an 'open-label' trial neither the health professionals delivering the interventions, nor the  
34 participants are blinded to treatment allocation. Statistical analyses will be conducted blinded to the  
35 intervention group.  
36  
37

### 38 **Trial intervention**

39  
40 The trial intervention is the regular use of a PEP flute in combination with standard care. A set of two PEP  
41 flutes and three airway resistances (equivalent to a resistance of 10-20 cm H<sub>2</sub>O) are delivered to the  
42 participants who are advised to use the PEP flute at least three times daily. Ideally, each session consists of  
43 10-15 breaths (for approximately 1 minute) repeated twice with the participant sitting at an upright position.  
44 Two video guides (Fig. 2) are sent to the participant by e-Boks; one with instructions as to the rationale and  
45 how to use the PEP flute including how to choose the suitable resistance; the other with instruction of  
46 hygienic maintenance, advised to be daily because of a manifest SARS-CoV-2 infection.  
47  
48  
49  
50  
51

52 > Insert Figure 2 <

53  
54 The use of a PEP flute is considered safe for even the weakest patient with lung disease[18]. The participants  
55 are instructed in using the flute with a pressure of approximately 10 cm H<sub>2</sub>O. If a person blows with full  
56 power, they might reach a pressure of approximately 50 cmH<sub>2</sub>O, whereas coughing generates a pressure in  
57  
58  
59  
60

1  
2  
3  
4 the lungs of 80-120 cm H<sub>2</sub>O[19]. The participants will be advised to stop the PEP flute session in case of any  
5 discomfort. Even among patients acutely ill with leukaemia and having neutropenia, no adverse events were  
6 detected related to PEP-usage[11]. Despite this, the participants in the intervention group are encouraged to  
7 inform the project manager in case of any adverse event during the trial via the designated hotline or by e-  
8 mail.  
9  
10  
11

12 Participants are advised to continue use of PEP in the active intervention period of 30 days or at least for as  
13 long as they still have respiratory symptoms. They receive daily text-messages administered as an automated  
14 service by Twilio Inc. to prompt their reporting of CAT-scores by links to a questionnaire in REDCap. Also,  
15 they are asked to report their present choice of airway resistance as well as the number of PEP flute sessions  
16 the previous day. These daily self-reports constitute assessment of treatment adherence.  
17  
18  
19  
20

### 21 **Standard of care**

22  
23 As selfcare in Covid-19, the Danish Health Authorities recommends a sufficient intake of liquid especially in  
24 case of high body temperature; potential use of paracetamol when having myalgia, headache and fever; and a  
25 throat lozenge in case of sore throat. Otherwise, the citizen with a positive SARS-CoV-2 test is requested to  
26 perform self-quarantine and to pay special attention to hygiene and cleaning maintenance. The participants  
27 in the usual care group also receive daily text-messages to prompt their reporting of CAT-scores by links to  
28 the electronic questionnaire.  
29  
30  
31  
32

33 To avoid attrition of the trial due to early recovery of symptoms, the project manager will contact the  
34 participants in both allocation groups by phone or text message approximately on day 15 to ask about their  
35 health condition and to answer to any potential concerns of continued participation in the trial.  
36  
37  
38

### 39 **Measurements**

40  
41 Data is collected both through questionnaires (primary outcome) and as register data (see Table 2). With  
42 consideration to the participants' possibly affection with sickness at inclusion point, the questionnaire at  
43 baseline is deliberately delimited. The participants are asked about educational/professional background as  
44 health care professionals have both higher incidence of Covid-19 and are presumably better qualified to  
45 conduct disease selfcare than lay persons. Health literacy will be measured by the two dimensions  
46 'Understanding' and 'Engagement' (five items each) derived from the multi-dimensional Health Literacy  
47 Questionnaire (HLQ™) and validated in a Danish general population survey[20]. The 'Understanding'  
48 dimension covers 'understanding health information well enough to know what to do', whereas  
49 'Engagement' covers 'the ability to actively engage with healthcare providers'[20]. In addition to  
50 abovementioned topics, the participants are asked one single item of self-rated health (on a five-point Likert  
51 scale) and a few questions about smoking and alcohol habits.  
52  
53  
54  
55  
56  
57  
58  
59  
60

## Primary outcome

The CAT-score is based on a validated questionnaire designed to evaluate symptoms in COPD patients[21]. The CAT-scale is free of use by courtesy of GlaxoSmithKline and is widely used in COPD-treatment both as a tele-monitoring tool and to stratify the patients into groups based upon the severity of symptoms. Even among the patients in the most unstable phase of COPD, daily self-report of CAT is considered quick and easy for patients to use[22]. The latter is important to ensure adequate data collection among the participants in the present trial. The eight items in the scale cover symptoms of cough, sputum, chest pain, dyspnoea, activities of daily living at home, feeling safe at home despite symptoms (modified for the present study from feeling safe at leaving home despite symptoms), sleep quality and vigour. The eight items sum up to a range of 0-40 with higher scores indicating more symptom impairment. Although validated for COPD-use, the CAT-scale is considered useful in the present study because several of the items (dyspnoea, cough, fatigue, sputum and pleuritic chest pain) previously have been used as outcome variables in pneumonia studies[23] and Covid-19 convalescents report long term breathlessness, chest pain and fatigue[24]. Based upon anecdotal evidence, a single course of Covid-19 revealed changes in CAT-score from CAT=5 prior to onset of symptoms to a peak of CAT=31 and a CAT=14 after a total of 40 days (personal communication).

Although the change in CAT-score from baseline to follow-up at day 30 is the primary outcome, the CAT-score as repeated daily measurements throughout the active intervention period of 30 days is supposed to contribute to a more thorough understanding of how the individual symptoms may intercorrelate and at what point a potential effect of the PEP-flute intervention may initiate and peak.

## Secondary outcomes

The secondary outcomes are comparison between the intervention group and the usual care group of the number of hospital admissions and use of antibiotics during the follow-up period. Moreover, number of participants with serious adverse events (SAEs) during the 30-day intervention period will be evaluated. Finally, potential sub-group effects by sex, age, comorbidity and body mass index (BMI) at study entry will be explored for all outcomes as various conditions and comorbidities such as diabetes, hypertension and other chronic diseases have been pointed out as prognostic risk factors[5].

## Statistical plan and data analysis

Both intention-to-treat and per-protocol analyses will be performed. The intention-to-treat population consists of all randomised participants irrespective of whether the participant received study intervention or whether the participant complied to the study protocol in the treatment group to which the participant was assigned at randomisation. The per-protocol population is defined as participants with a baseline measure of primary outcome and a follow-up measure of primary outcome at the primary assessment call (day 30). As regards the intervention group, participants fulfil the per-protocol criteria if they have complied to the PEP



1  
2  
3  
4 flute-intervention for as long as respiratory symptoms are still reported in the CAT-score. These data are  
5 accessible through the daily self-reports. Participants in the usual care group fulfil the per-protocol criteria if  
6 they have no major protocol violations i.e. have not reported the use of a PEP-flute or treatment related to the  
7 respiratory system from a physiotherapist.  
8  
9

10  
11 A statistical analysis plan that describes the details of the planned statistical analyses will be produced before  
12 last patient's last visit i.e. 30-day follow-up. Assessments of changes from baseline and construction of  
13 confidence intervals (CI) for continuous measures will be based on analysis of covariance (ANCOVA)  
14 including group as the main factor and baseline measure of outcome as covariate. Superiority will be claimed  
15 if the computed 95% CI of the estimated group difference in primary outcome does not include 0 in the ITT  
16 population. All statistical test will be two-sided and statistical significance will be claimed if the computed p-  
17 value is  $< 0.05$ .  
18  
19

20  
21  
22  
23 Interactions between intervention status and baseline participant groupings i.e. sex and age will be prioritised  
24 as a priori subgroup analyses for the primary and secondary outcomes.  
25

26  
27 Determination of sample size according to the primary outcome i.e. the self-reported symptom CAT-score  
28 was based upon reported symptom scores in a previous study of community-acquired pneumonia[23]. On a  
29 0-100 value scale (higher values indicate more symptoms), the mean symptom score at time of diagnosis was  
30 51.7 (SD 20.1). We used these scores as reference. Hence, we assumed the mean CAT-score in the PEP-  
31 CoV-trial at baseline to be 20.0 (SD 10.0). A minimal clinical reported difference (MCID) of 2.0 on the  
32 CAT-scale has been reported from clinical studies of COPD rehabilitation[25]. Based on this MCID; the  
33 assumed mean CAT-score at baseline; a significance level of 5 % and a power of 0.8, we have estimated a  
34 need of including  $n > 141$  in each group. With consideration to potential dropouts in a heterogenous sample,  
35 we assess that inclusion of 200 participants in each intervention arm will be an adequate number. A  
36 mitigation strategy has been developed to be executed in case of recruitment problems. An interim analysis  
37 showed that the mean CAT = 12.8 (SD 12.5) at baseline after recruiting 109 participants. No other interim  
38 analyses are planned. At present, the prevalence of hospital admission in Denmark is approximately 6 % and  
39 as such, we should expect 30 participants being hospitalised during the active intervention period of 30 days.  
40 However, we have not estimated sample size based upon hospital admission as outcome variable.  
41  
42  
43  
44  
45  
46  
47  
48

## 49 **ETHICS AND DISSEMINATION**

50  
51 The use of PEP flute is considered a low risk intervention with no expected side effect. Since the  
52 interventions will be delivered in combination with standard treatment and we will be closely monitoring  
53 potential side effects, we anticipate no ethical issues. The intervention is considered justifiable in a health  
54 research ethics perspective. Ethical approval has been granted by the local Health Ethics Committee (Journal  
55 number: H-20035929). The Danish Data Protection Agency has approved conduct of the trial (Capital  
56  
57  
58  
59  
60

1  
2  
3  
4 Region: P-2020-879). An inquiry about the study has been directed to the Danish Medicines Agency,  
5 because the PEP flute is classified as a medical device. No approval from the Agency is needed since the  
6 flute is used for a purpose within the CE-classification (Agency reference number: 2020051572). It has not  
7 been a requirement to compose a data monitoring committee. The trial is exploratory with a design that  
8 needs to adapt according to how the pandemic develops and the governmental countermeasures e.g. as  
9 regards testing and restrictions. The trial is internally monitored, evaluated and adjusted accordingly.  
10  
11

12  
13  
14 Prior to screening, all potential trial participants are informed, both orally and in writing, about the purpose  
15 of this trial, its process and potential risks, as well as costs and benefits of participation. After the  
16 information is delivered, read and understood, voluntary informed consent is given by the participant by  
17 signing an e-consent form before trial participation can take place.  
18  
19

20  
21 Protocol deviations and adverse events (AEs) are recorded by the data collectors (AM and ASB). The  
22 principal investigator and project manager (AM) monitor and do follow-up of possible AEs and serious  
23 adverse events (SAEs) throughout the study. These procedures are qualified by use of templates from the  
24 Danish GCP-units[26].  
25  
26

## 27 28 **POTENTIAL OUTCOMES AND IMPACT**

29

30  
31 The PEP-CoV project is an innovative project niched between screening / prevention through vaccine and  
32 hospitalisation / critical illness treatment. This is an important area that, to the best of our knowledge, has  
33 received limited attention from both research and Health Authorities. Coronavirus will continue to be present  
34 for the next several years. Thus, many people will become infected by the virus and develop Covid-19 and as  
35 a worldwide response to the pandemic, we need to focus upon selfcare. The PEP-CoV trial aims to prevent  
36 serious lung disease and possibly shorten the course of the disease with the use of a simple, cheap and  
37 accessible intervention, a PEP flute.  
38  
39

40  
41  
42 It is difficult to estimate how many hospitalisations among the group of people having Covid-19 could have  
43 avoided by the individual's use of a PEP flute. However, a PEP flute including postal deliverance costs  
44 approximately 10 €; a regular hospital bed costs around 1000 € a day, whereas an ICU-bed usually costs 2.-  
45 5.000 € a day. The PEP flute-selfcare intervention is feasible and easy to use. If it proves to be effective, it  
46 will be easy to implement as a public health intervention. This may result in less sick leave and less strain for  
47 the individual and the family. Moreover, potentially less severe courses of Covid-19 will reduce the overall  
48 burden of the health care system and the society whereby we can ensure continued normal high activity in  
49 the health care system. Handling the PEP flute as a selfcare tool during quarantine in one's own home may  
50 contribute to a sense of mastery and coping to potentially impact the course of disease through selfcare.  
51  
52 These latter perspectives may be explored subsequently in a qualitative study design.  
53  
54  
55  
56  
57  
58  
59  
60



1  
2  
3  
4 According to the ethical approval, the trial is obliged to recruit by a single invitation letter only, sent to the  
5 individual's official e-Boks and then await a request for further contact from the eligible participant. Many  
6 people check their e-Boks only occasionally. Other eligible participants may feel too sick to overcome this  
7 task. Hence, a large sample of individuals tested positive for SARS-CoV-2 will be invited to the trial with  
8 only very few to ask for contact. This may challenge a non-selective recruitment although the inclusion  
9 criteria are fewer than in many other randomised controlled trials.  
10  
11  
12  
13

14 Although warranted, it is not possible to deliver a placebo PEP flute-intervention. Thus, blinding of the  
15 patients and treatment providers is not feasible. Because the Covid-19 is a novel disease, this study is  
16 explorative in relation to using self-reported measurements from COPD-treatment i.e. the CAT-score as the  
17 primary outcome variable. In the design process, it was considered to add objective measures like oxygen  
18 saturation, body temperature and/or infectious biomarkers as outcome variables. However, the quarantine  
19 restrictions made this choice not feasible and the subsequent implementation of potential positive findings in  
20 a public health context advocated for the opt-out of objective measures. However, this issue calls for  
21 attention in the later discussion of the results of the trial.  
22  
23  
24  
25  
26  
27

28 There is a risk of contamination across arms as participants can acquire the PEP flute as over-the-counter  
29 medical equipment. The participants are asked at follow-up, if they have used a PEP flute and/or have  
30 received any physiotherapeutic treatment. As data will be analysed both as regards intention-to-treat and per-  
31 protocol, this will be directed in the interpretation of the results.  
32  
33  
34

### 35 **Trial status**

36 At submission of this manuscript, recruitment to the trial is ongoing with a total of 375 participants enrolled.  
37 The protocol was first prospectively registered [www.ClinicalTrials.gov](http://www.ClinicalTrials.gov) (NCT04530435) on August 27,  
38 2020. No amendments have been made to the protocol (version 3.0 July 14, 2020) since recruitment of the  
39 first participant. Minor amendments have been made to the registration December 16, 2020, with  
40 clarification of outcome measurements (general and respiratory symptoms). Recruitment was started on  
41 October 6, 2020 and the first participant was enrolled on this date as well. Data of test-positive individuals  
42 are provided from the beforementioned four microbiological departments. Recruitment was initiated based  
43 upon data from only one of the departments in the Capital Region to ensure feasibility of the data  
44 management process. One by one the other departments were enrolled and since end of October, we have  
45 obtained data of all individuals with tests analysed by the regional microbiological departments of the two  
46 regions.  
47  
48  
49  
50  
51  
52  
53

### 54 **Authors' contributions**

55 AM forwarded the idea and MKS gathered the project team. AM, MKS, SCL, MH, LMK, NW and BLH all  
56 contributed to the study conception and design. AM is the project manager. LMK steered the production of  
57 instruction videos. ASB steered the setup of data management system supervised by MH. AM and ASB both  
58  
59  
60

1  
2  
3  
4 handle recruitment, data collection, deliverance of intervention and assessment of all participants. AM  
5 handles the hotline and request of advice from participants including any adverse events. MH developed the  
6 allocation sequence. SCL manages data and statistical analysis. NW has the medical responsibility in  
7 conduct of the trial and BLH is project lead. AM drafted the manuscript and all authors commented on  
8 previous versions of the manuscript. All authors read and approved the final manuscript. All authors will  
9 contribute to the subsequent publication of findings according to the guidelines set forth by the International  
10 Committee of Medical Journal Editors. No professional writers will part of the reporting and publication of  
11 the results from the PEP-CoV trial.  
12  
13  
14  
15  
16

### 17 **Competing interests**

18 None of the authors declared any conflict of interest.  
19

### 20 **Acknowledgments**

21 By sharing their experiences of disease course, the Covid-19 convalescents are both acknowledged for  
22 valuable contributions to the trial design.  
23  
24

### 25 **Funding**

26 This work was supported by Innovation Fund Denmark (grant number 0211-00023B) and a grant  
27 (unnumbered) from the Danish Nursing Council. The Parker Institute, Bispebjerg and Frederiksberg Hospital  
28 is supported by a core grant from the Oak Foundation. The funders have no role in the design, conduct,  
29 collection of data, analysis, writing, or reporting of the trial.  
30  
31  
32

### 33 **REFERENCES**

- 34  
35  
36  
37  
38  
39  
40  
41  
42 1 Phua J, Weng L, Ling L, *et al*. Intensive care management of coronavirus disease 2019 (COVID-19):  
43 challenges and recommendations. *Lancet Respir Med* 2020;**8**:506–17. doi:10.1016/S2213-  
44 2600(20)30161-2  
45  
46 2 Reilev M, Kristensen KB, Pottegård A, *et al*. Characteristics and predictors of hospitalization and  
47 death in the first 9,519 cases with a positive RT-PCR test for SARS-CoV-2 in Denmark: A  
48 nationwide cohort. *medRxiv* Published Online First: 2020. doi:10.1101/2020.05.24.20111823  
49  
50 3 Haase N, Plovsing R, Christensen S, *et al*. Characteristics, interventions, and longer term outcomes of  
51 COVID-19 ICU patients in Denmark—A nationwide, observational study. *Acta Anaesthesiol Scand*  
52 2021;**65**:68–75. doi:10.1111/aas.13701  
53  
54 4 WHO. Covid-19: icd-10 coding guidance 1 18. 2020. <https://www.who.int/classifications/icd/COVID-19-coding-icd10.pdf> (accessed 12 Feb 2021).  
55  
56  
57  
58  
59  
60

1  
2  
3  
4  
5  
6  
7  
8  
9  
10  
11  
12  
13  
14  
15  
16  
17  
18  
19  
20  
21  
22  
23  
24  
25  
26  
27  
28  
29  
30  
31  
32  
33  
34  
35  
36  
37  
38  
39  
40  
41  
42  
43  
44  
45  
46  
47  
48  
49  
50  
51  
52  
53  
54  
55  
56  
57  
58  
59  
60

- 5 Docherty AB, Harrison EM, Green CA, *et al.* Features of 20 133 UK patients in hospital with covid-19 using the ISARIC WHO Clinical Characterisation Protocol: prospective observational cohort study. *BMJ Br Med journal* 2020;**369**:m1985. doi:10.1136/bmj.m1985
- 6 Beigel JH, Tomashek KM, Dodd LE, *et al.* Remdesivir for the Treatment of Covid-19 — Final Report. *N Engl J Med* 2020;**383**:1813–26. doi:10.1056/nejmoa2007764
- 7 Group TRC. Dexamethasone in Hospitalized Patients with Covid-19 — Preliminary Report. *N Engl J Med* 2020;:1–11. doi:10.1056/nejmoa2021436
- 8 Kofod LM, Jeschke KN, Krogh-Madsen R, *et al.* Kontinuerlig CPAP til patienter Kontinuerlig CPAP til patienter med COVID-19 med COVID-19. *Ugeskr Læger* 2020;:1–8. [article in Danish]
- 9 Radovanovic D, Rizzi M, Pini S, *et al.* Helmet CPAP to Treat Acute Hypoxemic Respiratory Failure in Patients with COVID-19: A Management Strategy Proposal. *J Clin Med* 2020;**9**:1191. doi:10.3390/jcm9041191
- 10 O’Neill K, O’Donnell AE, Bradley JM. Airway clearance, mucoactive therapies and pulmonary rehabilitation in bronchiectasis. *Respirology* 2019;**24**:227–37. doi:10.1111/resp.13459
- 11 Møller T, Moser C, Adamsen L, *et al.* Early warning and prevention of pneumonia in acute leukemia by patient education, spirometry, and positive expiratory pressure: A randomized controlled trial. *Am J Hematol* 2016;**91**:271–6. doi:10.1002/ajh.24262
- 12 Chan AW, Tetzlaff JM, Gøtzsche PC, *et al.* SPIRIT 2013 explanation and elaboration: guidance for protocols of clinical trials. *BMJ* 2013;**346**:1–42. doi:10.1136/bmj.e7586
- 13 Sudre CH, Murray B, Varsavsky T, *et al.* Attributes and predictors of Long-COVID: analysis of COVID cases and their symptoms collected by the Covid symptoms Study App. *medRxiv Prepr* Published Online First: 2020. <https://doi.org/10.1101/2020.10.19.20214494>
- 14 SSI. Covid-19 i Danmark. Epidemiologisk trend og fokus: Symptomer. Copenhagen: 2020. [report in Danish]
- 15 Petersen I, Phillips A. Three quarters of people with SARS-CoV-2 infection are asymptomatic: Analysis of english household survey data. *Clin Epidemiol* 2020;**12**:1039–43. doi:10.2147/CLEP.S276825
- 16 SSI. COVIDmeter. <https://covid19.ssi.dk/overvagningsdata/undersogelser/covidmeter> (accessed 4 Feb 2021). [report in Danish]
- 17 Harris PA, Taylor R, Thielke R, *et al.* Research electronic data capture (REDCap)—A metadata-driven methodology and workflow process for providing translational research informatics support. *J Biomed Inform* 2009;**42**:377–81. doi:10.1016/j.jbi.2008.08.010
- 18 Osadnik CR, McDonald CF, Jones AP, *et al.* Airway clearance techniques for chronic obstructive pulmonary disease. *Cochrane Database Syst Rev* Published Online First: 2012. doi:10.1002/14651858.cd008328.pub2

- 1  
2  
3  
4 19 Smith JA, Aliverti A, Quaranta M, *et al.* Chest wall dynamics during voluntary and induced cough in  
5 healthy volunteers. *J Physiol* 2012;**590**:563–74. doi:10.1113/jphysiol.2011.213157  
6  
7 20 Bo A, Friis K, Osborne RH, *et al.* National indicators of health literacy: Ability to understand health  
8 information and to engage actively with healthcare providers - A populationbased survey among  
9 Danish adults. *BMC Public Health* 2014;**14**:1–12. doi:10.1186/1471-2458-14-1095  
10  
11 21 Jones PW, Harding G, Berry P, *et al.* Development and first validation of the COPD Assessment  
12 Test. *Eur Respir J* 2009;**34**:648–54. doi:10.1183/09031936.00102509  
13  
14 22 Region Sjælland. Sundhedsfagligt indhold i TeleKol. 2017.  
15 <https://www.regionsjaelland.dk/Sundhed/samarbejde-og-indsatser/Telesundhed->  
16 [KOL/Documents/TeleKOL\\_LANDSDEL\\_SJÆLLANDS\\_sundhedsfaglige\\_anbefalinger\\_v1.01.pdf](https://www.regionsjaelland.dk/Sundhed/samarbejde-og-indsatser/Telesundhed-KOL/Documents/TeleKOL_LANDSDEL_SJÆLLANDS_sundhedsfaglige_anbefalinger_v1.01.pdf)  
17 [guidelines in Danish]  
18  
19 23 Metlay JP, Fine MJ, Schulz R, *et al.* Measuring symptomatic and functional recovery in patients with  
20 community-acquired pneumonia. *J Gen Intern Med* 1997;**12**:423–30. doi:10.1046/j.1525-  
21 1497.1997.00074.x  
22  
23 24 Andersen KJ. Åndenød på 8. uge. *Sygeplejersken* 2020;**6**:50-51. [article in Danish]  
24  
25 25 Jones P, Jenkins C, Agusti A. *et al.* Healthcare Professional User Guide. 2018;1-20.  
26 [www.catestonline.org](http://www.catestonline.org) (The COPD Assessment Test (CAT) accessed 1 Mar 2021)  
27  
28 26 GCP-units. The Danish Good Clinical Practice Units. <https://gcp-enhed.dk/english/> (accessed 16 Feb  
29 2021).  
30  
31  
32  
33  
34  
35  
36

## 37 LEGENDS

38  
39  
40 Figure 1: Relationship between population/setting and level of care/treatment options of SARS-CoV-2 and  
41 Covid-19. Upwards arrows indicate disease trajectory and higher level of care accordingly (to the left) and  
42 add-ons of treatment options (right side). Abbreviations: PEEP, positive end expiratory pressure; FiO<sub>2</sub>,  
43 inspired oxygen fraction; NIV, non-invasive ventilation; ECMO, extracorporeal membrane oxygenation;  
44 CPAP, continuous positive airway pressure  
45

46 Figure 2: Still-photos from instruction videos about PEP flute usage and hygienic maintenance.  
47 In details, 2a: how to use the PEP flute; 2b: how to assemble the three parts of the flute correctly; 2c: how to  
48 choose the suitable resistance, and 2d: how to perform hygienic maintenance of the PEP flute. Both videos  
49 including the shown subtitles in Danish are produced by the Department of Communication at Copenhagen  
50 University Hospital Hvidovre  
51  
52  
53  
54  
55  
56  
57  
58  
59  
60

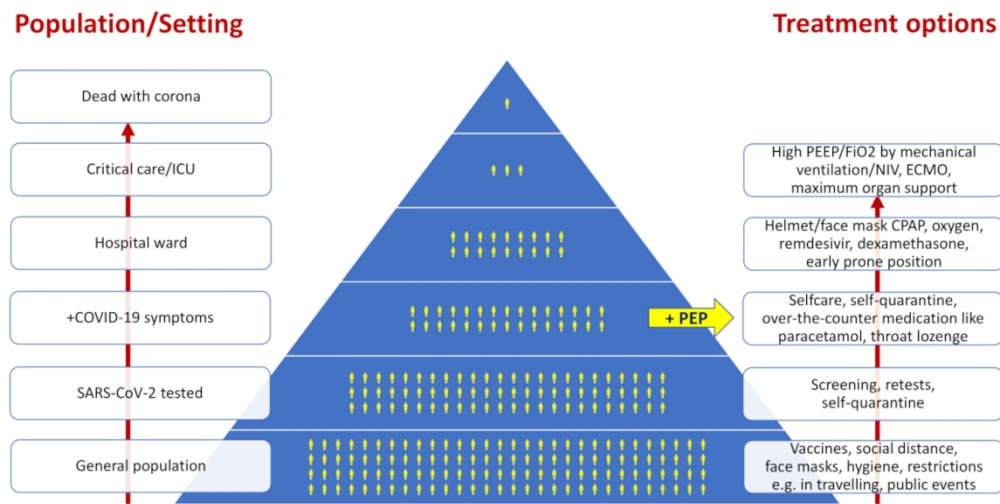

Figure 1: Relationship between population/setting and level of care/treatment options of SARS-CoV-2 and Covid-19. Upwards arrows indicate disease trajectory and higher level of care accordingly (to the left) and add-ons of treatment options (right side). Abbreviations: PEEP, positive end expiratory pressure; FiO<sub>2</sub>, inspired oxygen fraction; NIV, non-invasive ventilation; ECMO, extracorporeal membrane oxygenation; CPAP, continuous positive airway pressure

190x107mm (300 x 300 DPI)

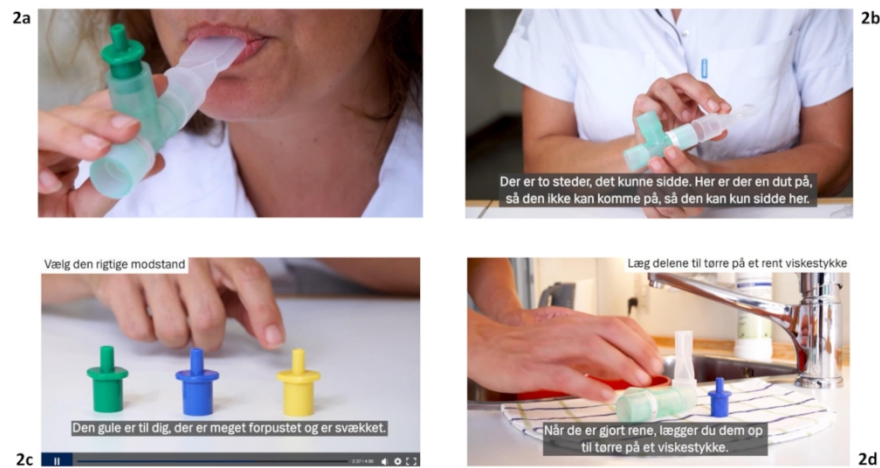

Figure 2: Still-photos from instruction videos about PEP flute usage and hygienic maintenance. In details, 2a: how to use the PEP flute; 2b: how to assemble the three parts of the flute correctly; 2c: how to choose the suitable resistance, and 2d: how to perform hygienic maintenance of the PEP flute. Both videos including the shown subtitles in Danish are produced by the Department of Communication at Copenhagen University Hospital Hvidovre

190x107mm (300 x 300 DPI)

The PEP-CoV protocol: a PEP flute-selfcare randomised controlled trial to prevent respiratory deterioration and hospitalisation in SARS-CoV-2 infected individuals with Covid-19 symptoms

# Reporting checklist for protocol of a clinical trial.

Based on the SPIRIT guidelines.

## Instructions to authors

Complete this checklist by entering the page numbers from your manuscript where readers will find each of the items listed below.

Your article may not currently address all the items on the checklist. Please modify your text to include the missing information. If you are certain that an item does not apply, please write "n/a" and provide a short explanation.

Upload your completed checklist as an extra file when you submit to a journal.

In your methods section, say that you used the SPIRIT reporting guidelines, and cite them as:

Chan A-W, Tetzlaff JM, Gøtzsche PC, Altman DG, Mann H, Berlin J, Dickersin K, Hróbjartsson A, Schulz KF, Parulekar WR, Krleža-Jerić K, Laupacis A, Moher D. SPIRIT 2013 Explanation and Elaboration: Guidance for protocols of clinical trials. *BMJ*. 2013;346:e7586

|                                   | Reporting Item                                                                                                                  | Page Number |
|-----------------------------------|---------------------------------------------------------------------------------------------------------------------------------|-------------|
| <b>Administrative information</b> |                                                                                                                                 |             |
| Title                             | <a href="#">#1</a> Descriptive title identifying the study design, population, interventions, and, if applicable, trial acronym | 1           |



The PEP-CoV protocol: a PEP flute-selfcare randomised controlled trial to prevent respiratory deterioration and hospitalisation in SARS-CoV-2 infected individuals with Covid-19 symptoms

|    |                     |                     |                                                  |
|----|---------------------|---------------------|--------------------------------------------------|
| 1  |                     |                     |                                                  |
| 2  |                     |                     |                                                  |
| 3  |                     |                     |                                                  |
| 4  | Trial registration  | <a href="#">#2a</a> | Trial identifier and registry name. If not yet   |
| 5  |                     |                     | registered, name of intended registry            |
| 6  |                     |                     |                                                  |
| 7  |                     |                     |                                                  |
| 8  |                     |                     |                                                  |
| 9  | Trial registration: | <a href="#">#2b</a> | All items from the World Health Organization     |
| 10 |                     |                     |                                                  |
| 11 | data set            |                     | Trial Registration Data Set                      |
| 12 |                     |                     |                                                  |
| 13 |                     |                     |                                                  |
| 14 | Protocol version    | <a href="#">#3</a>  | Date and version identifier                      |
| 15 |                     |                     |                                                  |
| 16 |                     |                     |                                                  |
| 17 | Funding             | <a href="#">#4</a>  | Sources and types of financial, material, and    |
| 18 |                     |                     | other support                                    |
| 19 |                     |                     |                                                  |
| 20 |                     |                     |                                                  |
| 21 |                     |                     |                                                  |
| 22 |                     |                     |                                                  |
| 23 | Roles and           | <a href="#">#5a</a> | Names, affiliations, and roles of protocol       |
| 24 |                     |                     |                                                  |
| 25 | responsibilities:   |                     | contributors                                     |
| 26 |                     |                     |                                                  |
| 27 | contributorship     |                     |                                                  |
| 28 |                     |                     |                                                  |
| 29 |                     |                     |                                                  |
| 30 | Roles and           | <a href="#">#5b</a> | Name and contact information for the trial       |
| 31 |                     |                     |                                                  |
| 32 | responsibilities:   |                     | sponsor                                          |
| 33 |                     |                     |                                                  |
| 34 | sponsor contact     |                     |                                                  |
| 35 |                     |                     |                                                  |
| 36 |                     |                     |                                                  |
| 37 | information         |                     |                                                  |
| 38 |                     |                     |                                                  |
| 39 |                     |                     |                                                  |
| 40 | Roles and           | <a href="#">#5c</a> | Role of study sponsor and funders, if any, in    |
| 41 |                     |                     |                                                  |
| 42 | responsibilities:   |                     | study design; collection, management,            |
| 43 |                     |                     |                                                  |
| 44 | sponsor and funder  |                     | analysis, and interpretation of data; writing of |
| 45 |                     |                     |                                                  |
| 46 |                     |                     |                                                  |
| 47 |                     |                     |                                                  |
| 48 |                     |                     |                                                  |
| 49 |                     |                     |                                                  |
| 50 |                     |                     |                                                  |
| 51 |                     |                     |                                                  |
| 52 |                     |                     |                                                  |
| 53 |                     |                     |                                                  |
| 54 |                     |                     |                                                  |
| 55 |                     |                     |                                                  |
| 56 |                     |                     |                                                  |
| 57 |                     |                     |                                                  |
| 58 |                     |                     |                                                  |
| 59 |                     |                     |                                                  |
| 60 |                     |                     |                                                  |



The PEP-CoV protocol: a PEP flute-selfcare randomised controlled trial to prevent respiratory deterioration and hospitalisation in SARS-CoV-2 infected individuals with Covid-19 symptoms

|    |                      |                     |                                                     |
|----|----------------------|---------------------|-----------------------------------------------------|
| 1  |                      |                     |                                                     |
| 2  |                      |                     |                                                     |
| 3  |                      |                     |                                                     |
| 4  | Roles and            | <a href="#">#5d</a> | Composition, roles, and responsibilities of the     |
| 5  |                      |                     |                                                     |
| 6  | responsibilities:    |                     | coordinating centre, steering committee,            |
| 7  |                      |                     |                                                     |
| 8  | committees           |                     | endpoint adjudication committee, data               |
| 9  |                      |                     |                                                     |
| 10 |                      |                     | management team, and other individuals or           |
| 11 |                      |                     |                                                     |
| 12 |                      |                     | groups overseeing the trial, if applicable (see     |
| 13 |                      |                     |                                                     |
| 14 |                      |                     |                                                     |
| 15 |                      |                     | Item 21a for data monitoring committee)             |
| 16 |                      |                     |                                                     |
| 17 |                      |                     |                                                     |
| 18 | <b>Introduction</b>  |                     |                                                     |
| 19 |                      |                     |                                                     |
| 20 |                      |                     |                                                     |
| 21 | Background and       | <a href="#">#6a</a> | Description of research question and                |
| 22 |                      |                     |                                                     |
| 23 | rationale            |                     | justification for undertaking the trial, including  |
| 24 |                      |                     |                                                     |
| 25 |                      |                     | summary of relevant studies (published and          |
| 26 |                      |                     |                                                     |
| 27 |                      |                     | unpublished) examining benefits and harms           |
| 28 |                      |                     |                                                     |
| 29 |                      |                     | for each intervention                               |
| 30 |                      |                     |                                                     |
| 31 |                      |                     |                                                     |
| 32 |                      |                     |                                                     |
| 33 | Background and       | <a href="#">#6b</a> | Explanation for choice of comparators               |
| 34 |                      |                     |                                                     |
| 35 | rationale: choice of |                     |                                                     |
| 36 |                      |                     |                                                     |
| 37 | comparators          |                     |                                                     |
| 38 |                      |                     |                                                     |
| 39 |                      |                     |                                                     |
| 40 |                      |                     |                                                     |
| 41 | Objectives           | <a href="#">#7</a>  | Specific objectives or hypotheses                   |
| 42 |                      |                     |                                                     |
| 43 |                      |                     |                                                     |
| 44 | Trial design         | <a href="#">#8</a>  | Description of trial design including type of trial |
| 45 |                      |                     |                                                     |
| 46 |                      |                     | (eg, parallel group, crossover, factorial, single   |
| 47 |                      |                     |                                                     |
| 48 |                      |                     | group), allocation ratio, and framework (eg,        |
| 49 |                      |                     |                                                     |
| 50 |                      |                     | superiority, equivalence, non-inferiority,          |
| 51 |                      |                     |                                                     |
| 52 |                      |                     | exploratory)                                        |
| 53 |                      |                     |                                                     |
| 54 |                      |                     |                                                     |
| 55 |                      |                     |                                                     |
| 56 |                      |                     |                                                     |
| 57 |                      |                     |                                                     |
| 58 |                      |                     |                                                     |
| 59 |                      |                     |                                                     |
| 60 |                      |                     |                                                     |

The PEP-CoV protocol: a PEP flute-selfcare randomised controlled trial to prevent respiratory deterioration and hospitalisation in SARS-CoV-2 infected individuals with Covid-19 symptoms

## Methods:

### Participants, interventions, and outcomes

|                                 |                      |                                                                                                                                                                                                  |      |
|---------------------------------|----------------------|--------------------------------------------------------------------------------------------------------------------------------------------------------------------------------------------------|------|
| Study setting                   | <a href="#">#9</a>   | Description of study settings (eg, community clinic, academic hospital) and list of countries where data will be collected. Reference to where list of study sites can be obtained               | 6-7  |
| Eligibility criteria            | <a href="#">#10</a>  | Inclusion and exclusion criteria for participants. If applicable, eligibility criteria for study centres and individuals who will perform the interventions (eg, surgeons, psychotherapists)     | 7-9  |
| Interventions:<br>description   | <a href="#">#11a</a> | Interventions for each group with sufficient detail to allow replication, including how and when they will be administered                                                                       | 9-10 |
| Interventions:<br>modifications | <a href="#">#11b</a> | Criteria for discontinuing or modifying allocated interventions for a given trial participant (eg, drug dose change in response to harms, participant request, or improving / worsening disease) | 9-10 |
| Interventions:<br>adherence     | <a href="#">#11c</a> | Strategies to improve adherence to intervention protocols, and any procedures for                                                                                                                | 10   |

The PEP-CoV protocol: a PEP flute-selfcare randomised controlled trial to prevent respiratory deterioration and hospitalisation in SARS-CoV-2 infected individuals with Covid-19 symptoms

monitoring adherence (eg, drug tablet return; laboratory tests)

|                                                                                                                            |                                    |                      |                                                                                                                                                                                                                                                                                                                                                                                |           |
|----------------------------------------------------------------------------------------------------------------------------|------------------------------------|----------------------|--------------------------------------------------------------------------------------------------------------------------------------------------------------------------------------------------------------------------------------------------------------------------------------------------------------------------------------------------------------------------------|-----------|
| 8<br>9<br>10<br>11<br>12                                                                                                   | Interventions:<br>concomitant care | <a href="#">#11d</a> | Relevant concomitant care and interventions that are permitted or prohibited during the trial                                                                                                                                                                                                                                                                                  | 10-12     |
| 13<br>14<br>15<br>16<br>17<br>18<br>19<br>20<br>21<br>22<br>23<br>24<br>25<br>26<br>27<br>28<br>29<br>30<br>31<br>32<br>33 | Outcomes                           | <a href="#">#12</a>  | Primary, secondary, and other outcomes, including the specific measurement variable (eg, systolic blood pressure), analysis metric (eg, change from baseline, final value, time to event), method of aggregation (eg, median, proportion), and time point for each outcome. Explanation of the clinical relevance of chosen efficacy and harm outcomes is strongly recommended | 7 + 10-12 |
| 34<br>35<br>36<br>37<br>38<br>39<br>40<br>41<br>42<br>43<br>44<br>45                                                       | Participant timeline               | <a href="#">#13</a>  | Time schedule of enrolment, interventions (including any run-ins and washouts), assessments, and visits for participants. A schematic diagram is highly recommended (see Figure)                                                                                                                                                                                               | 8         |
| 46<br>47<br>48<br>49<br>50<br>51<br>52<br>53<br>54<br>55<br>56<br>57<br>58<br>59<br>60                                     | Sample size                        | <a href="#">#14</a>  | Estimated number of participants needed to achieve study objectives and how it was determined, including clinical and statistical assumptions supporting any sample size calculations                                                                                                                                                                                          | 12        |

The PEP-CoV protocol: a PEP flute-selfcare randomised controlled trial to prevent respiratory deterioration and hospitalisation in SARS-CoV-2 infected individuals with Covid-19 symptoms

|    |                           |                      |                                                   |
|----|---------------------------|----------------------|---------------------------------------------------|
| 1  |                           |                      |                                                   |
| 2  |                           |                      |                                                   |
| 3  |                           |                      |                                                   |
| 4  | Recruitment               | <a href="#">#15</a>  | Strategies for achieving adequate participant     |
| 5  |                           |                      | enrolment to reach target sample size             |
| 6  |                           |                      |                                                   |
| 7  |                           |                      |                                                   |
| 8  |                           |                      |                                                   |
| 9  | <b>Methods:</b>           |                      |                                                   |
| 10 |                           |                      |                                                   |
| 11 | <b>Assignment of</b>      |                      |                                                   |
| 12 |                           |                      |                                                   |
| 13 | <b>interventions (for</b> |                      |                                                   |
| 14 |                           |                      |                                                   |
| 15 | <b>controlled trials)</b> |                      |                                                   |
| 16 |                           |                      |                                                   |
| 17 |                           |                      |                                                   |
| 18 |                           |                      |                                                   |
| 19 | Allocation:               | <a href="#">#16a</a> | Method of generating the allocation sequence      |
| 20 | sequence                  |                      | (eg, computer-generated random numbers),          |
| 21 |                           |                      | and list of any factors for stratification. To    |
| 22 | generation                |                      | reduce predictability of a random sequence,       |
| 23 |                           |                      | details of any planned restriction (eg, blocking) |
| 24 |                           |                      | should be provided in a separate document         |
| 25 |                           |                      | that is unavailable to those who enrol            |
| 26 |                           |                      | participants or assign interventions              |
| 27 |                           |                      |                                                   |
| 28 |                           |                      |                                                   |
| 29 |                           |                      |                                                   |
| 30 |                           |                      |                                                   |
| 31 |                           |                      |                                                   |
| 32 |                           |                      |                                                   |
| 33 |                           |                      |                                                   |
| 34 |                           |                      |                                                   |
| 35 |                           |                      |                                                   |
| 36 |                           |                      |                                                   |
| 37 |                           |                      |                                                   |
| 38 | Allocation                | <a href="#">#16b</a> | Mechanism of implementing the allocation          |
| 39 | concealment               |                      | sequence (eg, central telephone; sequentially     |
| 40 |                           |                      | numbered, opaque, sealed envelopes),              |
| 41 | mechanism                 |                      | describing any steps to conceal the sequence      |
| 42 |                           |                      | until interventions are assigned                  |
| 43 |                           |                      |                                                   |
| 44 |                           |                      |                                                   |
| 45 |                           |                      |                                                   |
| 46 |                           |                      |                                                   |
| 47 |                           |                      |                                                   |
| 48 |                           |                      |                                                   |
| 49 |                           |                      |                                                   |
| 50 | Allocation:               | <a href="#">#16c</a> | Who will generate the allocation sequence,        |
| 51 | implementation            |                      | who will enrol participants, and who will assign  |
| 52 |                           |                      | participants to interventions                     |
| 53 |                           |                      |                                                   |
| 54 |                           |                      |                                                   |
| 55 |                           |                      |                                                   |
| 56 |                           |                      |                                                   |
| 57 |                           |                      |                                                   |
| 58 |                           |                      |                                                   |
| 59 |                           |                      |                                                   |
| 60 |                           |                      |                                                   |

The PEP-CoV protocol: a PEP flute-selfcare randomised controlled trial to prevent respiratory deterioration and hospitalisation in SARS-CoV-2 infected individuals with Covid-19 symptoms

1  
2  
3  
4 Blinding (masking) [#17a](#) Who will be blinded after assignment to 9 + 14  
5  
6 interventions (eg, trial participants, care  
7  
8 providers, outcome assessors, data analysts),  
9  
10 and how  
11  
12

13 Blinding (masking): [#17b](#) If blinded, circumstances under which n/a: Open-label trial  
14  
15 emergency unblinding is permissible, and procedure for with no blinding  
16  
17 unblinding revealing a participant's allocated intervention  
18  
19 during the trial  
20  
21  
22

23 **Methods: Data**  
24  
25 **collection,**  
26  
27 **management, and**  
28  
29 **analysis**  
30  
31  
32

33 Data collection plan [#18a](#) Plans for assessment and collection of 10-12  
34  
35 outcome, baseline, and other trial data,  
36  
37 including any related processes to promote  
38  
39 data quality (eg, duplicate measurements,  
40  
41 training of assessors) and a description of  
42  
43 study instruments (eg, questionnaires,  
44  
45 laboratory tests) along with their reliability and  
46  
47 validity, if known. Reference to where data  
48  
49 collection forms can be found, if not in the  
50  
51  
52  
53  
54  
55  
56  
57  
58  
59  
60 protocol

The PEP-CoV protocol: a PEP flute-selfcare randomised controlled trial to prevent respiratory deterioration and hospitalisation in SARS-CoV-2 infected individuals with Covid-19 symptoms

|    |                      |                      |                                                    |
|----|----------------------|----------------------|----------------------------------------------------|
| 1  |                      |                      |                                                    |
| 2  |                      |                      |                                                    |
| 3  |                      |                      |                                                    |
| 4  | Data collection      | <a href="#">#18b</a> | Plans to promote participant retention and         |
| 5  |                      |                      |                                                    |
| 6  | plan: retention      |                      | complete follow-up, including list of any          |
| 7  |                      |                      |                                                    |
| 8  |                      |                      | outcome data to be collected for participants      |
| 9  |                      |                      |                                                    |
| 10 |                      |                      | who discontinue or deviate from intervention       |
| 11 |                      |                      |                                                    |
| 12 |                      |                      | protocols                                          |
| 13 |                      |                      |                                                    |
| 14 |                      |                      |                                                    |
| 15 | Data management      | <a href="#">#19</a>  | Plans for data entry, coding, security, and        |
| 16 |                      |                      |                                                    |
| 17 |                      |                      | storage, including any related processes to        |
| 18 |                      |                      |                                                    |
| 19 |                      |                      | promote data quality (eg, double data entry;       |
| 20 |                      |                      |                                                    |
| 21 |                      |                      | range checks for data values). Reference to        |
| 22 |                      |                      |                                                    |
| 23 |                      |                      | where details of data management procedures        |
| 24 |                      |                      |                                                    |
| 25 |                      |                      | can be found, if not in the protocol               |
| 26 |                      |                      |                                                    |
| 27 |                      |                      |                                                    |
| 28 |                      |                      |                                                    |
| 29 |                      |                      |                                                    |
| 30 | Statistics:          | <a href="#">#20a</a> | Statistical methods for analysing primary and      |
| 31 |                      |                      |                                                    |
| 32 | outcomes             |                      | secondary outcomes. Reference to where             |
| 33 |                      |                      |                                                    |
| 34 |                      |                      | other details of the statistical analysis plan can |
| 35 |                      |                      |                                                    |
| 36 |                      |                      | be found, if not in the protocol                   |
| 37 |                      |                      |                                                    |
| 38 |                      |                      |                                                    |
| 39 |                      |                      |                                                    |
| 40 | Statistics:          | <a href="#">#20b</a> | Methods for any additional analyses (eg,           |
| 41 |                      |                      |                                                    |
| 42 | additional analyses  |                      | subgroup and adjusted analyses)                    |
| 43 |                      |                      |                                                    |
| 44 |                      |                      |                                                    |
| 45 |                      |                      |                                                    |
| 46 |                      |                      |                                                    |
| 47 |                      |                      |                                                    |
| 48 | Statistics: analysis | <a href="#">#20c</a> | Definition of analysis population relating to      |
| 49 |                      |                      |                                                    |
| 50 | population and       |                      | protocol non-adherence (eg, as randomised          |
| 51 |                      |                      |                                                    |
| 52 | missing data         |                      | analysis), and any statistical methods to          |
| 53 |                      |                      |                                                    |
| 54 |                      |                      | handle missing data (eg, multiple imputation)      |
| 55 |                      |                      |                                                    |
| 56 |                      |                      |                                                    |
| 57 |                      |                      |                                                    |
| 58 |                      |                      |                                                    |
| 59 |                      |                      |                                                    |
| 60 |                      |                      |                                                    |

The PEP-CoV protocol: a PEP fluoride-selfcare randomised controlled trial to prevent respiratory deterioration and hospitalisation in SARS-CoV-2 infected individuals with Covid-19 symptoms

## Methods:

### Monitoring

|                                      |                                                                                                                                                                                                                                                                                                                                                            |            |
|--------------------------------------|------------------------------------------------------------------------------------------------------------------------------------------------------------------------------------------------------------------------------------------------------------------------------------------------------------------------------------------------------------|------------|
| Data monitoring:<br>formal committee | <a href="#">#21a</a> Composition of data monitoring committee (DMC); summary of its role and reporting structure; statement of whether it is independent from the sponsor and competing interests; and reference to where further details about its charter can be found, if not in the protocol. Alternatively, an explanation of why a DMC is not needed | 13         |
| Data monitoring:<br>interim analysis | <a href="#">#21b</a> Description of any interim analyses and stopping guidelines, including who will have access to these interim results and make the final decision to terminate the trial                                                                                                                                                               | 12         |
| Harms                                | <a href="#">#22</a> Plans for collecting, assessing, reporting, and managing solicited and spontaneously reported adverse events and other unintended effects of trial interventions or trial conduct                                                                                                                                                      | 10-11 + 13 |
| Auditing                             | <a href="#">#23</a> Frequency and procedures for auditing trial conduct, if any, and whether the process will be independent from investigators and the sponsor                                                                                                                                                                                            | 13         |

The PEP-CoV protocol: a PEP flute-selfcare randomised controlled trial to prevent respiratory deterioration and hospitalisation in SARS-CoV-2 infected individuals with Covid-19 symptoms

## Ethics and

### dissemination

|                                      |                      |                                                                                                                                                                                                                                    |                                                                  |
|--------------------------------------|----------------------|------------------------------------------------------------------------------------------------------------------------------------------------------------------------------------------------------------------------------------|------------------------------------------------------------------|
| Research ethics approval             | <a href="#">#24</a>  | Plans for seeking research ethics committee / institutional review board (REC / IRB) approval                                                                                                                                      | 7 + 12: The trial is approved                                    |
| Protocol amendments                  | <a href="#">#25</a>  | Plans for communicating important protocol modifications (eg, changes to eligibility criteria, outcomes, analyses) to relevant parties (eg, investigators, REC / IRBs, trial participants, trial registries, journals, regulators) | 13-14                                                            |
| Consent or assent                    | <a href="#">#26a</a> | Who will obtain informed consent or assent from potential trial participants or authorised surrogates, and how (see Item 32)                                                                                                       | 13-15                                                            |
| Consent or assent: ancillary studies | <a href="#">#26b</a> | Additional consent provisions for collection and use of participant data and biological specimens in ancillary studies, if applicable                                                                                              | 13: Ethical approval is needed in case of qualitative evaluation |
| Confidentiality                      | <a href="#">#27</a>  | How personal information about potential and enrolled participants will be collected, shared, and maintained in order to protect confidentiality before, during, and after the trial                                               | 8 + 12-13                                                        |



The PEP-CoV protocol: a PEP flute-selfcare randomised controlled trial to prevent respiratory deterioration and hospitalisation in SARS-CoV-2 infected individuals with Covid-19 symptoms

|    |                       |                      |                                                   |
|----|-----------------------|----------------------|---------------------------------------------------|
| 1  |                       |                      |                                                   |
| 2  |                       |                      |                                                   |
| 3  |                       |                      |                                                   |
| 4  | Declaration of        | <a href="#">#28</a>  | Financial and other competing interests for       |
| 5  |                       |                      |                                                   |
| 6  | interests             |                      | principal investigators for the overall trial and |
| 7  |                       |                      |                                                   |
| 8  |                       |                      | each study site                                   |
| 9  |                       |                      |                                                   |
| 10 |                       |                      |                                                   |
| 11 | Data access           | <a href="#">#29</a>  | Statement of who will have access to the final    |
| 12 |                       |                      |                                                   |
| 13 |                       |                      | trial dataset, and disclosure of contractual      |
| 14 |                       |                      |                                                   |
| 15 |                       |                      | agreements that limit such access for             |
| 16 |                       |                      |                                                   |
| 17 |                       |                      | investigators                                     |
| 18 |                       |                      |                                                   |
| 19 |                       |                      |                                                   |
| 20 |                       |                      |                                                   |
| 21 | Ancillary and post    | <a href="#">#30</a>  | Provisions, if any, for ancillary and post-trial  |
| 22 |                       |                      |                                                   |
| 23 | trial care            |                      | care, and for compensation to those who           |
| 24 |                       |                      |                                                   |
| 25 |                       |                      | suffer harm from trial participation              |
| 26 |                       |                      |                                                   |
| 27 |                       |                      |                                                   |
| 28 |                       |                      |                                                   |
| 29 |                       |                      |                                                   |
| 30 |                       |                      |                                                   |
| 31 | Dissemination         | <a href="#">#31a</a> | Plans for investigators and sponsor to            |
| 32 |                       |                      |                                                   |
| 33 | policy: trial results |                      | communicate trial results to participants,        |
| 34 |                       |                      |                                                   |
| 35 |                       |                      | healthcare professionals, the public, and other   |
| 36 |                       |                      |                                                   |
| 37 |                       |                      | relevant groups (eg, via publication, reporting   |
| 38 |                       |                      |                                                   |
| 39 |                       |                      | in results databases, or other data sharing       |
| 40 |                       |                      |                                                   |
| 41 |                       |                      | arrangements), including any publication          |
| 42 |                       |                      |                                                   |
| 43 |                       |                      | restrictions                                      |
| 44 |                       |                      |                                                   |
| 45 |                       |                      |                                                   |
| 46 |                       |                      |                                                   |
| 47 | Dissemination         | <a href="#">#31b</a> | Authorship eligibility guidelines and any         |
| 48 |                       |                      |                                                   |
| 49 | policy: authorship    |                      | intended use of professional writers              |
| 50 |                       |                      |                                                   |
| 51 |                       |                      |                                                   |
| 52 |                       |                      |                                                   |
| 53 | Dissemination         | <a href="#">#31c</a> | Plans, if any, for granting public access to the  |
| 54 |                       |                      |                                                   |
| 55 | policy: reproducible  |                      | full protocol, participant-level dataset, and     |
| 56 |                       |                      |                                                   |
| 57 | research              |                      | statistical code                                  |
| 58 |                       |                      |                                                   |
| 59 |                       |                      |                                                   |
| 60 |                       |                      |                                                   |

The PEP-CoV protocol: a PEP flute-selfcare randomised controlled trial to prevent respiratory deterioration and hospitalisation in SARS-CoV-2 infected individuals with Covid-19 symptoms

## Appendices

|                            |                     |                                                                                                                                                                                                |                                                                          |
|----------------------------|---------------------|------------------------------------------------------------------------------------------------------------------------------------------------------------------------------------------------|--------------------------------------------------------------------------|
| Informed consent materials | <a href="#">#32</a> | Model consent form and other related documentation given to participants and authorised surrogates                                                                                             | n/a: Documentation in Danish; not suitable for international publication |
| Biological specimens       | <a href="#">#33</a> | Plans for collection, laboratory evaluation, and storage of biological specimens for genetic or molecular analysis in the current trial and for future use in ancillary studies, if applicable | n/a: No specimens are collected                                          |

### Notes:

- 17b: n/a: Open-label trial with no blinding
- 20a: 11-12: A statistical analysis plan will be amended the protocol
- 20b: Will be described in the statistical analysis plan
- 20c: Will be described in the statistical analysis plan
- 24: 7 + 12: The trial is approved
- 26b: 14: Ethical approval is needed in case of qualitative evaluation
- 29: 7 + 15: The trial is initiated and sponsored by the research institution
- 30: 12-15: The trial has ethical approval and insurance via the research organisation
- 31c: n/a: Documents in Danish and public access is not planned

The PEP-CoV protocol: a PEP flute-selfcare randomised controlled trial to prevent respiratory deterioration and hospitalisation in SARS-CoV-2 infected individuals with Covid-19 symptoms

- 32: n/a: Documentation in Danish; not suitable for international publication
- 33: n/a: No specimens are collected The SPIRIT Explanation and Elaboration paper is distributed under the terms of the Creative Commons Attribution License CC-BY-NC. This checklist was completed on 17. February 2021 using <https://www.goodreports.org/>, a tool made by the [EQUATOR Network](#) in collaboration with [Penelope.ai](#)

For peer review only

# BMJ Open

## The PEP-CoV protocol: a PEP flute-selfcare randomised controlled trial to prevent respiratory deterioration and hospitalisation in early Covid-19

|                                 |                                                                                                                                                                                                                                                                                                                                                                                                                                                                                                                                                                                                                                                                                                                                                                                                                                                                                                                                                                                                                                                                                                                         |
|---------------------------------|-------------------------------------------------------------------------------------------------------------------------------------------------------------------------------------------------------------------------------------------------------------------------------------------------------------------------------------------------------------------------------------------------------------------------------------------------------------------------------------------------------------------------------------------------------------------------------------------------------------------------------------------------------------------------------------------------------------------------------------------------------------------------------------------------------------------------------------------------------------------------------------------------------------------------------------------------------------------------------------------------------------------------------------------------------------------------------------------------------------------------|
| Journal:                        | <i>BMJ Open</i>                                                                                                                                                                                                                                                                                                                                                                                                                                                                                                                                                                                                                                                                                                                                                                                                                                                                                                                                                                                                                                                                                                         |
| Manuscript ID                   | bmjopen-2021-050582.R1                                                                                                                                                                                                                                                                                                                                                                                                                                                                                                                                                                                                                                                                                                                                                                                                                                                                                                                                                                                                                                                                                                  |
| Article Type:                   | Protocol                                                                                                                                                                                                                                                                                                                                                                                                                                                                                                                                                                                                                                                                                                                                                                                                                                                                                                                                                                                                                                                                                                                |
| Date Submitted by the Author:   | 14-May-2021                                                                                                                                                                                                                                                                                                                                                                                                                                                                                                                                                                                                                                                                                                                                                                                                                                                                                                                                                                                                                                                                                                             |
| Complete List of Authors:       | Mollerup, Annette; Copenhagen University Hospital, The Parker Institute, Frederiksberg; University College Copenhagen, The Bachelor of Science in Nursing Programme, The Danish Deaconess Community Frederiksberg Larsen, Sofus; Copenhagen University Hospital, The Parker Institute, Frederiksberg<br>Bennetzen, Anita; Copenhagen University Hospital, The Parker Institute, Frederiksberg<br>Henriksen, Marius; Copenhagen University Hospital, The Parker Institute, Frederiksberg<br>Simonsen, Mette; Copenhagen University Hospital, Department of Neuro-Medicine, Bispebjerg<br>Weis, Nina; Copenhagen University Hospital, Department of Infectious Diseases, Hvidovre; University of Copenhagen, Department of Clinical Medicine, Faculty of Health and Medical Science<br>Kofod, Linette; Copenhagen University Hospital, Department of Physio- and Occupational Therapy and PMR-C, Hvidovre<br>Heitmann, Berit; Copenhagen University Hospital, The Parker Institute, Research Unit for Dietary Studies, Frederiksberg; University of Copenhagen, Section for General Practice, Department of Public Health |
| <b>Primary Subject Heading</b>: | Global health                                                                                                                                                                                                                                                                                                                                                                                                                                                                                                                                                                                                                                                                                                                                                                                                                                                                                                                                                                                                                                                                                                           |
| Secondary Subject Heading:      | Public health, Respiratory medicine, Infectious diseases                                                                                                                                                                                                                                                                                                                                                                                                                                                                                                                                                                                                                                                                                                                                                                                                                                                                                                                                                                                                                                                                |
| Keywords:                       | COVID-19, PREVENTIVE MEDICINE, PUBLIC HEALTH, RESPIRATORY MEDICINE (see Thoracic Medicine), Clinical trials < THERAPEUTICS, INFECTIOUS DISEASES                                                                                                                                                                                                                                                                                                                                                                                                                                                                                                                                                                                                                                                                                                                                                                                                                                                                                                                                                                         |
|                                 |                                                                                                                                                                                                                                                                                                                                                                                                                                                                                                                                                                                                                                                                                                                                                                                                                                                                                                                                                                                                                                                                                                                         |

SCHOLARONE™  
Manuscripts



I, the Submitting Author has the right to grant and does grant on behalf of all authors of the Work (as defined in the below author licence), an exclusive licence and/or a non-exclusive licence for contributions from authors who are: i) UK Crown employees; ii) where BMJ has agreed a CC-BY licence shall apply, and/or iii) in accordance with the terms applicable for US Federal Government officers or employees acting as part of their official duties; on a worldwide, perpetual, irrevocable, royalty-free basis to BMJ Publishing Group Ltd ("BMJ") its licensees and where the relevant Journal is co-owned by BMJ to the co-owners of the Journal, to publish the Work in this journal and any other BMJ products and to exploit all rights, as set out in our [licence](#).

The Submitting Author accepts and understands that any supply made under these terms is made by BMJ to the Submitting Author unless you are acting as an employee on behalf of your employer or a postgraduate student of an affiliated institution which is paying any applicable article publishing charge ("APC") for Open Access articles. Where the Submitting Author wishes to make the Work available on an Open Access basis (and intends to pay the relevant APC), the terms of reuse of such Open Access shall be governed by a Creative Commons licence – details of these licences and which [Creative Commons](#) licence will apply to this Work are set out in our licence referred to above.

Other than as permitted in any relevant BMJ Author's Self Archiving Policies, I confirm this Work has not been accepted for publication elsewhere, is not being considered for publication elsewhere and does not duplicate material already published. I confirm all authors consent to publication of this Work and authorise the granting of this licence.

**Title:**

The PEP-CoV protocol: a PEP flute-selfcare randomised controlled trial to prevent respiratory deterioration and hospitalisation in early Covid-19

**Corresponding Author:**

Annette Mollerup

The Parker Institute

Copenhagen University Hospital Bispebjerg-Frederiksberg

Nordre Fasanvej 57, Vej 8, Indgang 11

2000 Frederiksberg, Denmark

+45 38 16 31 02

E-mail: [annette.mollerup@regionh.dk](mailto:annette.mollerup@regionh.dk)**Authors:**

Annette Mollerup<sup>1,2</sup>, Sofus C. Larsen<sup>1</sup>, Anita S. Bennetzen<sup>1</sup>, Marius Henriksen<sup>1</sup>, Mette K. Simonsen<sup>1,3</sup>, Nina Weis<sup>4,5</sup>, Linette M. Kofod<sup>6</sup>, Berit L. Heitmann<sup>1,7</sup>

<sup>1</sup>The Parker Institute, Copenhagen University Hospital Bispebjerg-Frederiksberg, Denmark

<sup>2</sup>University College Diakonissestiftelsen, The Bachelor of Science in Nursing Programme, The Danish Deaconess Community, Frederiksberg, Denmark

<sup>3</sup>Department of Neurology, Copenhagen University Hospital Bispebjerg-Frederiksberg, Denmark

<sup>4</sup>Department of Infectious Diseases, Copenhagen University Hospital Hvidovre, Denmark

<sup>5</sup>Department of Clinical Medicine, Faculty of Health and Medical Science, University of Copenhagen, Denmark

<sup>6</sup>Department of Physio- and Occupational Therapy and PMR-C, Copenhagen University Hospital Hvidovre, Denmark

<sup>7</sup>Section for General Practice, Department of Public Health, University of Copenhagen, Denmark

**Word count: 4367****Keywords:** SARS-CoV-2 infection, Covid-19, selfcare, public health, randomised controlled trial

## 30 ABSTRACT

### 31 **The PEP-CoV protocol: a PEP flute-selfcare randomised controlled trial to prevent respiratory** 32 **deterioration and hospitalisation in early Covid-19**

#### 33 **Introduction**

34 Infection with severe acute respiratory syndrome Corona Virus 2 (SARS-CoV-2) may progress to severe  
35 pulmonary disease Covid-19. Currently, patients admitted to hospital because of Covid-19 have better  
36 prognosis than during the first period of the pandemic due to improved treatment. However, the overall  
37 societal susceptibility of being infected makes it pivotal to prevent severe courses of disease to avoid high  
38 mortality rates and collapse of the health care systems. Positive expiratory pressure (PEP) selfcare is used in  
39 chronic pulmonary disease and has been shown to prevent pneumonia in a high-risk cohort of leukaemia  
40 patients. The PEP-CoV trial examines the effectiveness on respiratory symptoms and need of hospital  
41 admission by regular PEP flute-use among non-hospitalised individuals with confirmed SARS-CoV-2  
42 infection and Covid-19 symptoms.

#### 43 **Methods and analysis**

44 In this randomised controlled trial, we hypothesise that daily PEP flute usage as add-on to usual care is  
45 superior to usual care as regards symptom severity measured by the COPD Assessment Test (CAT) at 30-  
46 day follow-up (primary outcome) and hospital admission through register data (secondary outcome). We  
47 expect to recruit 400 individuals for the trial. Participants in the intervention group receive a kit of 2 PEP  
48 flutes and adequate resistances and access to instruction videos. A telephone hotline offers possible contact  
49 to a nurse. The 8-item CAT-score measures cough, sputum, chest pain, dyspnoea, activities of daily living at  
50 home, feeling safe at home despite symptoms, sleep quality and vigour. The CAT-score is measured daily in  
51 both intervention and control arms by surveys prompted through text messages.

#### 52 **Ethics and dissemination**

53 The study was registered prospectively at [www.clinicaltrials.gov](http://www.clinicaltrials.gov) on August 27, 2020 (NCT04530435).  
54 Ethical approval was granted by the local Health Research Ethics Committee (Journal number: H-20035929)  
55 July 23, 2020. Enrolment of participants began October 6, 2020. Results will be published in scientific  
56 journals.

#### 57 **Keywords**

58 SARS-CoV-2 infection, Covid-19, selfcare, public health, randomised controlled trial

1  
2  
3  
4 60 **ARTICLE SUMMARY**

5  
6 61 **Strengths and limitations of this study**

- 7  
8 62 • Using a randomised design, this study addresses an important evidence gap in the SARS-CoV-2  
9 63 pandemic; how to mobilise the individual's selfcare to prevent respiratory deterioration in Covid-19  
10 64 with the use of a simple, cheap and accessible intervention, thus potentially avoid hospitalisation.  
11 65 • This study is a niche project between a public health intervention and disease prevention in a clinical  
12 66 setting which may challenge a warranted non-selective recruitment as recruitment awaits the  
13 67 initiative from eligible participants.  
14 68 • Due to the type of intervention, blinding of the participants and treatment providers is not feasible.  
15 69 • Covid-19 is a novel disease and this study is explorative when using self-reported measurements  
16 70 from COPD-treatment i.e. the CAT-score as an outcome variable. In the absence of objectively  
17 71 measured values like oxygen saturation or body temperature as outcome variables, this calls for  
18 72 attention when discussing the results of the trial.  
19 73 • There is a risk of contamination across arms as participants can acquire the PEP flute as over-the-  
20 74 counter medical equipment.  
21  
22  
23  
24  
25  
26  
27  
28  
29  
30  
31  
32  
33  
34  
35  
36  
37  
38  
39  
40  
41  
42  
43  
44  
45  
46  
47  
48  
49  
50  
51  
52  
53  
54  
55  
56  
57  
58  
59  
60



## 76 INTRODUCTION

77 The pandemic infection with severe acute respiratory syndrome Corona Virus 2 (SARS-CoV-2) may result  
78 in non-specific symptoms like fever, fatigue and dyspnoea or it may progress to severe pulmonary disease  
79 Corona Virus Disease 2019 (Covid-19). Mid-January 2021 as reported by WHO, the worldwide number of  
80 people dying because of Covid-19 exceeded two million. Over time, we learn more about this new disease  
81 e.g. reports of a median time from symptom onset to development of pneumonia of approximately 5 days.[1]  
82 Covid-19 seems to damage the respiratory system due to an overreaction of the immune system with  
83 individual risk profiles of age and comorbidity.[2] This may lead to acute respiratory distress syndrome  
84 (ARDS) and in these cases, the median time from symptom onset to severe hypoxemia and intensive care  
85 unit (ICU) admission has been reported to be approximately 7-12 days.[1] At a median follow-up period of  
86 79 days among ICU-patients, mortality was reported to be 37 % in a Danish nationwide study. Hence, the  
87 Covid-19 disease burdens the health care systems even in countries without any restrictions as to ICU-  
88 admission in times of a pandemic.[3]

89 At present, the disease trajectory is not easy to predict,[1] and little is known of any measures or medication  
90 to alter the course of early-stage disease i.e. to prevent the need of hospitalisation and critical care. The PEP-  
91 CoV trial will investigate the effect of PEP flute-selfcare on respiratory deterioration and hospital admission  
92 among non-hospitalised individuals with Covid-19 symptoms. If PEP flute-selfcare proves to be effective, it  
93 will be easy to implement as a public health intervention also in a global context. In the trial, participants  
94 have confirmed SARS-CoV-2 infection by positive PCR swab test and Covid-19 symptoms at study entry  
95 hence, although no medical examination has been conducted, they are considered to be Covid-19 cases  
96 according to WHO Covid-19 case definitions.[4]

### 97 Background and rationale

98 Recent evidence suggests a poor prognosis whenever the Covid-19 disease has become so severe that  
99 hospital admission is needed. A large observational cohort study from UK found that within a minimal  
100 follow-up time of two weeks 26 % of patients admitted to acute care hospitals had died.[5] Among patients  
101 in need of critical care facilities and/or receiving mechanical ventilation, the proportion of fatal outcome was  
102 32 % and 37 % respectively. In the pandemic waves, health care systems face an imminent threat of collapse  
103 because of an overload of Covid-19 cases. The prognosis of having a severe course of disease due to Covid-  
104 19 is better now than in the first period of the pandemic because of improvements in treatment. Antiviral  
105 treatment with remdesivir and dexamethasone appears to have moderate effects. [6, 7] However, both  
106 treatments are administered only in cases when the patient is hospitalised and in need of oxygen. In the  
107 overall population, all are at risk of being infected and this overall societal susceptibility makes prevention of  
108 severe courses of disease pivotal to the health care system.

1  
2  
3  
4 109 A variety of symptoms have been observed in patients with Covid-19. The study by Docherty et al. refers to  
5  
6 110 clusters of symptoms on admission i.e. musculoskeletal symptoms (myalgia, joint pain, headache, and  
7  
8 111 fatigue); enteric symptoms (abdominal pain, vomiting, and diarrhoea); and a mucocutaneous cluster.[5]  
9 112 However, the most common symptom cluster involves respiratory symptoms i.e. cough, sputum and  
10  
11 113 shortness of breath, accompanied by fever. When critically ill, the intensive care treatment includes  
12 114 mechanical ventilation with high oxygenation and positive end expiratory pressure (PEEP). PEEP increases  
13  
14 115 functional residual capacity (FRC) and reduces the work of breathing. The use of positive expiratory  
15 116 pressure (PEP) has been highlighted as very important measures to avoid a critical course administered as  
16  
17 117 continuous positive airway pressure (CPAP) by face masks or by use of a helmet.[8, 9] However, this  
18  
19 118 treatment is for hospitalised patients. PEP is used as selfcare in chronic inflammatory pulmonary diseases  
20 119 like chronic obstructive pulmonary disease (COPD) despite the lack of robust evidence. In an RCT, PEP  
21  
22 120 therapy as add-on to usual medical care had only minor effects among inpatients with acute exacerbation of  
23 121 COPD. The intervention led to more rapidly improved dyspnoea following discharge but had no impact on  
24  
25 122 subsequent exacerbations and hospitalisations.[10] Little is known of the potential effects of PEP as selfcare  
26 123 in pneumonia prevention. Among patients with leukaemia, PEP alongside daily spirometry was superior to  
27  
28 124 daily spirometry to prevent pneumonia (first pneumonia incidence per 1000 days 2.17 versus 6.52,  $p = 0.021$ ,  
29  
30 125 intervention group and control group respectively).[11] The mechanically supported inflation of the alveoli  
31 126 and loosening of secretions by PEP presumably prevented manifest lung infiltrates without any adverse  
32  
33 127 events.[11] Among several effects, use of PEP can increase FRC and tidal volume, decrease hyperinflation  
34 128 and improve airway clearance.[12] Moreover, in both healthy subjects and patients undergoing surgery,  
35  
36 129 increased gas exchange and decreased atelectasis have been reported after PEP usage.[12] Analogously, PEP  
37  
38 130 may have beneficial effects on the progression of symptoms in the Covid-19 trajectory. Airway Clearance  
39 131 Techniques (ACT) appear to be safe and the PEP flute has shown as effective as other ACTs.[13]  
40  
41 132 Most current research on SARS-CoV-2 and Covid-19 relates to screening measures, vaccine development  
42  
43 133 and optimising hospital treatment i.e. the bottom and top ends of a pyramid which depicts the relationship  
44  
45 134 between populational size, setting and treatment options (Fig. 1). It is likely that we have this pandemic for  
46 135 several years until we have reached a high level of immunity in the population either by natural spread of the  
47  
48 136 disease or via an efficient vaccination programme and measures are needed to help the SARS-CoV-2  
49 137 infected individual at home to overcome the course of disease with less symptoms and strain. Based on the  
50  
51 138 hypothesis that the regular use of a PEP flute may prevent the progression of respiratory symptoms in non-  
52 139 hospitalised individuals with SARS-CoV-2 infection, a PEP flute intervention, feasible for home use, may  
53  
54 140 prevent prolonged disease courses, long-term sequelae and costly hospital admissions.  
55

56 141 > Insert Figure 1 <  
57  
58 142  
59 143  
60

1  
2  
3  
4  
5  
6  
7  
8  
9  
10  
11  
12  
13  
14  
15  
16  
17  
18  
19  
20  
21  
22  
23  
24  
25  
26  
27  
28  
29  
30  
31  
32  
33  
34  
35  
36  
37  
38  
39  
40  
41  
42  
43  
44  
45  
46  
47  
48  
49  
50  
51  
52  
53  
54  
55  
56  
57  
58  
59  
60

## 144 **Study objectives and hypotheses**

145 The aim of the present study is to explore the effectiveness on respiratory symptoms by regular use of PEP  
146 among SARS-CoV-2 infected, non-hospitalised individuals with Covid-19 symptoms. The primary objective  
147 is to examine the effect of PEP flute use on self-reported symptoms during 30 days of follow-up. We  
148 hypothesise that PEP flute use has positive effects on self-reported respiratory symptoms such as dyspnoea,  
149 coughing and perceived mucus clearance through beneficial effects on lung function and airway clearance.  
150 Secondly, we expect a lower rate of hospitalisation and use of antibiotics in the intervention group as  
151 compared to the usual care group, the latter in case of a bacterial superinfection.

## 152 **METHODS**

### 153 **Trial design and setting**

154 The PEP-CoV trial is designed as a randomised, controlled, open-label trial with two parallel groups and  
155 consecutive inclusion. The trial is investigator-initiated and hosted by the Parker Institute, a part of  
156 Copenhagen University Hospital Bispebjerg-Frederiksberg. The participants are recruited from the Capital  
157 Region and Region Zealand in Denmark (in total, approximately 2.7 million citizens). The trial registration  
158 data set is displayed in Table 1.

### 159 **Patient and Public Involvement**

160 Ideation of the trial intervention was based upon anecdotal evidence of a PEP flute's beneficial effects in a  
161 single case of Covid-19. Personal communication with Covid-19 convalescents has contributed to the  
162 designing process of the study. However, due to the ongoing pandemic crisis further patient and public  
163 involvement in the research process has not been feasible.

165 Table 1

| Table 1 WHO trial registration data set       |                                                                                                                                                                                                                                                                                                                                                                                                                                                                                                                                                                                                                                                                                                                                                                                                                                                                                                                               |
|-----------------------------------------------|-------------------------------------------------------------------------------------------------------------------------------------------------------------------------------------------------------------------------------------------------------------------------------------------------------------------------------------------------------------------------------------------------------------------------------------------------------------------------------------------------------------------------------------------------------------------------------------------------------------------------------------------------------------------------------------------------------------------------------------------------------------------------------------------------------------------------------------------------------------------------------------------------------------------------------|
| Data category                                 | Information                                                                                                                                                                                                                                                                                                                                                                                                                                                                                                                                                                                                                                                                                                                                                                                                                                                                                                                   |
| Primary registry and trial identifying number | ClinicalTrials.gov NCT04530435                                                                                                                                                                                                                                                                                                                                                                                                                                                                                                                                                                                                                                                                                                                                                                                                                                                                                                |
| Date of registration in primary registry      | 27 august, 2020                                                                                                                                                                                                                                                                                                                                                                                                                                                                                                                                                                                                                                                                                                                                                                                                                                                                                                               |
| Secondary identifying numbers                 | Danish Data Protection Agency (P-2020-879)<br>Health Research Ethics (H-20035929)                                                                                                                                                                                                                                                                                                                                                                                                                                                                                                                                                                                                                                                                                                                                                                                                                                             |
| Sources of monetary or material support       | The Danish Innovation Fund (0211-00023B) and the Danish Nursing Council (grant number: n/a)                                                                                                                                                                                                                                                                                                                                                                                                                                                                                                                                                                                                                                                                                                                                                                                                                                   |
| Sponsor                                       | The Parker Institute, Copenhagen, Denmark                                                                                                                                                                                                                                                                                                                                                                                                                                                                                                                                                                                                                                                                                                                                                                                                                                                                                     |
| Contact for public queries                    | Annette Mollerup, PhD (annette.mollerup@regionh.dk)<br>The Parker Institute<br>Copenhagen University Hospital Bispebjerg-Frederiksberg<br>Ndr. Fasanvej 57, 2000 Frederiksberg, Denmark<br>+45 38163102                                                                                                                                                                                                                                                                                                                                                                                                                                                                                                                                                                                                                                                                                                                       |
| Contact for scientific queries                | Annette Mollerup, PhD (annette.mollerup@regionh.dk)                                                                                                                                                                                                                                                                                                                                                                                                                                                                                                                                                                                                                                                                                                                                                                                                                                                                           |
| Public title                                  | Covid-19: symptoms and respiratory selfcare [in Danish: COVID-19 sygdom: symptomer og vejtrækningsøvelser]                                                                                                                                                                                                                                                                                                                                                                                                                                                                                                                                                                                                                                                                                                                                                                                                                    |
| Scientific title                              | PEP flute-selfcare to prevent respiratory deterioration and hospitalisation among Covid-19 patients: a randomised trial (acronym: The PEP-CoV trial)                                                                                                                                                                                                                                                                                                                                                                                                                                                                                                                                                                                                                                                                                                                                                                          |
| Countries of recruitment                      | Denmark                                                                                                                                                                                                                                                                                                                                                                                                                                                                                                                                                                                                                                                                                                                                                                                                                                                                                                                       |
| Health condition(s)                           | Adults aged 18 or older with a positive SARS-CoV-2 test and symptoms of COVID-19                                                                                                                                                                                                                                                                                                                                                                                                                                                                                                                                                                                                                                                                                                                                                                                                                                              |
| Intervention                                  | Active comparator: daily use of PEP flute and daily self-monitoring of symptoms for 30 days as add-on to usual care<br>Comparator: daily self-monitoring of symptoms and usual care including selfcare recommended by the Danish Health Authorities (self-quarantine, sufficient intake of liquid especially in case of high body temperature, over-the-counter symptom relieving medication)                                                                                                                                                                                                                                                                                                                                                                                                                                                                                                                                 |
| Key inclusion and exclusion criteria          | Inclusion criteria:<br>1. Aged 18 years or older<br>2. Positive SARS-CoV-test<br>3. Symptoms of Covid-19 according to the COVIDmeter; at least one respiratory symptom (cough, sneezing, shortness of breath, chest pain, running nose) and one general symptom<br>4. Access to use a smartphone<br>5. Can reply to a questionnaire in Danish (sent on email, text-message or via telephone interview) as assessed by the investigator<br>6. Given informed consent<br>Exclusion criteria:<br>1. Any condition or impairment that, in the opinion of the investigator, makes a potential participant unsuitable for participation or which obstruct participation, such as psychiatric disorders, individuals, habitually using a PEP flute, participation in other clinical Covid-trials or persons living in the same household as existing participants in the trial<br>2. Hospitalized patients or nursing home residents |
| Study type                                    | Interventional, open-label trial with randomisation to two parallel groups<br>Primary purpose: prevention of respiratory deterioration of symptoms and hospitalisation                                                                                                                                                                                                                                                                                                                                                                                                                                                                                                                                                                                                                                                                                                                                                        |
| Date of first enrollment                      | October 2020                                                                                                                                                                                                                                                                                                                                                                                                                                                                                                                                                                                                                                                                                                                                                                                                                                                                                                                  |
| Target sample size                            | 400                                                                                                                                                                                                                                                                                                                                                                                                                                                                                                                                                                                                                                                                                                                                                                                                                                                                                                                           |
| Recruitment status                            | Recruiting                                                                                                                                                                                                                                                                                                                                                                                                                                                                                                                                                                                                                                                                                                                                                                                                                                                                                                                    |
| Primary outcome                               | Day 30 COPD Assessment Test score (CAT-score) (modified for the present study)                                                                                                                                                                                                                                                                                                                                                                                                                                                                                                                                                                                                                                                                                                                                                                                                                                                |
| Key secondary outcomes                        | 1. Hospital admissions on Day 30, Day 90 and Day 180<br>2. Use of antibiotics in case of superinfection<br>3. Covid-19 symptoms Day 30, Day 90 and Day 180<br>4. CAT-score Day 90 and Day 180<br>5. Number of participants with serious adverse events (SAE) during the 30-day intervention period<br>6. Compliance assessment                                                                                                                                                                                                                                                                                                                                                                                                                                                                                                                                                                                                |

PEP, positive expiratory pressure; COVID-meter, the Danish Health Authority surveillance of symptoms reported by the public to a designated website; CAT, COPD Assessment Tool consisting of eight items on a scale from 0-5: cough, sputum, chest pain, dyspnoea, activities of daily living at home, feeling safe at home despite symptoms (because of actual self-quarantine, modified for the present study from feeling safe at leaving home despite symptoms), sleep quality and vigour

The study duration is six months and the primary endpoint is CAT-score after 30 days of active intervention. Follow-ups of CAT-scores are also planned at 90- and 180-days post-baseline. The study's enrolment, intervention and assessments schedules according to SPIRIT Guidelines are outlined in Table 2.[14]

175

176

Table 2

| Table 2 Schedule for study enrolment, intervention and assessments |                 |                |                               |                             |                              |
|--------------------------------------------------------------------|-----------------|----------------|-------------------------------|-----------------------------|------------------------------|
| Activity/assessment                                                | Recruitment     | Enrolment      | Follow-up <sub>30days</sub>   | Follow-up <sub>90days</sub> | Follow-up <sub>180days</sub> |
| Time point                                                         | T <sub>-1</sub> | T <sub>0</sub> | T <sub>1</sub>                | T <sub>2</sub>              | T <sub>3</sub>               |
| Pre-screening (positive PCR-test)                                  | x               |                |                               |                             |                              |
| Information to e-Boks                                              | x               |                |                               |                             |                              |
| Informed e-consent                                                 |                 | x              |                               |                             |                              |
| Eligibility screening                                              |                 | x              |                               |                             |                              |
| Baseline questionnaire                                             |                 | x              |                               |                             |                              |
| Randomisation/group allocation                                     |                 | x              |                               |                             |                              |
| Video guides                                                       |                 | x              |                               |                             |                              |
| PEP flute deliverance                                              |                 | x (+3 days)    |                               |                             |                              |
| Self-report of symptoms (CAT)                                      |                 | x (+1 day)     | ----- x (day 30)              |                             |                              |
| Intervention group: PEP-usage                                      |                 | x (+1 day)     | ----- x (day 30)              |                             |                              |
| Compliance assessment                                              |                 | x (+1 day)     | ----- x (day 30)              |                             |                              |
| Outcome assessment                                                 |                 |                | x                             | x                           | x                            |
| <b>Baseline/outcome variables*</b>                                 |                 |                |                               |                             |                              |
| Age, sex (register data)                                           | x               |                |                               |                             |                              |
| Symptoms within last week                                          |                 | x              | x                             | x                           | x                            |
| Cohabitation                                                       |                 | x              |                               |                             |                              |
| Education                                                          |                 | x              |                               |                             |                              |
| Health literacy (two dimensions)                                   |                 | x              |                               |                             |                              |
| Profession, employment                                             |                 | x              |                               |                             |                              |
| Self-rated health (one item)                                       |                 | x              | x                             | x                           | x                            |
| Weight, height                                                     |                 | x              |                               |                             |                              |
| Smoking, alcohol                                                   |                 | x              |                               |                             |                              |
| Comorbidity self-reported                                          |                 | x              |                               |                             |                              |
| Comorbidity (register data)                                        |                 |                | x                             |                             |                              |
| CAT-score                                                          |                 | x              | x                             | x                           | x                            |
| Hospital admission (register data)                                 |                 |                | x                             |                             | x                            |
| Medication (register data)                                         |                 |                | x                             |                             | x                            |
| Death (register data)                                              |                 |                | x                             |                             | x                            |
| Serious adverse event                                              |                 |                | As needed throughout protocol |                             |                              |

\*All baseline and outcome variables are collected as questionnaire data unless stated otherwise

### Trial population and eligibility criteria

To avoid unnecessary spread of the SARS-CoV-2, any contact i.e. oral information, consent and screening is provided over phone and by use of secured electronic communication via the public 'Digital Post' system (electronic mailbox for letters from Danish authorities) administered by the platform 'e-Boks' (<https://www.e-boks.com/danmark/en>). This system is linked to the individual's Personal Identification number – a national identification number, which is part of the personal information stored in the Danish Civil Registration System. Daily information of positive results from the SARS-CoV-2 PCR-tests are provided from the Departments of Microbiology at Copenhagen University Hospitals Rigshospitalet, Hvidovre Hospital and Herlev Hospital, which covers the overall Capital Region, and the Department of Microbiology, Slagelse Hospital, covering the entire Region Zealand. Based upon these data, individuals eligible for study participation receive study information and invitation electronically via e-Boks. The individual may then contact the project directly via e-mail or phone or leave a phone number for a subsequent call from the data collectors (AM and ASB).

1  
2  
3  
4 192 The inclusion/exclusion criteria for the trial are described in Table 1. The exclusion criteria are deliberately  
5  
6 193 few to reflect the target population and promote a highly scalable Public Health implementation given a  
7  
8 194 successful intervention. Various symptoms have been associated to Covid-19[5,15] and early Danish reports  
9 195 indicated that the most frequent self-reported respiratory symptoms in Covid-19 (n = 308) were cough (71%)  
10  
11 196 and shortness of breath (54 %).[16] However, recent findings have suggested that approximately three  
12 197 quarters of people with SARS-CoV-2 infection are asymptomatic on the day of the test.[17] As the rationale  
13  
14 198 for the potential effect of a PEP flute in a course of SARS-CoV-2 infection and Covid-19 involves the  
15 199 progression of respiratory symptoms, at least one reported respiratory symptom is required at enrolment. A  
16  
17 200 screening manual has been developed and questions of symptoms according to the COVIDmeter[18] are  
18  
19 201 posed after given consent (Table 2).

### 20 21 202 **Randomisation and blinding**

22  
23 203 The participants reply to a telephone-administered baseline questionnaire before randomisation.  
24  
25 204 Subsequently, the participant is randomly allocated to treatment or control arm using an appropriate  
26 205 statistical software embedded in REDCap, an online web-based clinical trial management application  
27  
28 206 (Vanderbilt University, Nashville, TN, USA).[19] The computer-generated random allocation is then  
29 207 unknown to the investigator and data collectors. As mortality prognosis to Covid-19 is higher in men and  
30  
31 208 elderly,[5] the allocation is based upon permuted random blocks and 1:1 stratified for the conditions sex and  
32 209 age (< 60 and ≥ 60 years). Sex is determined through the unique Danish personal identification number as a  
33  
34 210 binary variable.

35  
36 211 As this is an ‘open-label’ trial neither the health professionals delivering the interventions, nor the  
37  
38 212 participants are blinded to treatment allocation. Statistical analyses will be conducted blinded to the  
39  
40 213 intervention group.

### 41 42 214 **Trial intervention**

43  
44 215 The trial intervention is the regular use of a PEP flute in combination with usual care. A set of two PEP  
45 216 flutes and three airway resistances (equivalent to a resistance of 10-20 cm H<sub>2</sub>O) are delivered to the  
46  
47 217 participants who are advised to use the PEP flute at least three times daily. Ideally, each session consists of  
48  
49 218 10-15 breaths (for approximately 1 minute) repeated twice with the participant sitting at an upright position.  
50 219 Two video guides (Fig. 2) are sent to the participant by e-Boks; one with instructions as to the rationale and  
51  
52 220 how to use the PEP flute including how to choose the suitable resistance; the other with instruction of  
53  
54 221 hygienic maintenance, advised to be daily because of a manifest SARS-CoV-2 infection.

55  
56 222 > Insert Figure 2 <



1  
2  
3  
4 223 The use of a PEP flute is considered safe for even the weakest patient with lung disease.[20] The participants  
5  
6 224 are instructed in using the flute with a pressure of approximately 10 cm H<sub>2</sub>O. If a person blows with full  
7  
8 225 power, they might reach a pressure of approximately 50 cmH<sub>2</sub>O, whereas coughing generates a pressure in  
9  
10 226 the lungs of 80-120 cm H<sub>2</sub>O.[21] The participants will be advised to stop the PEP flute session in case of any  
11  
12 227 discomfort. Even among patients acutely ill with leukaemia and having neutropenia, no adverse events were  
13  
14 228 detected related to PEP-usage.[11] Despite this, the participants in the intervention group are encouraged to  
15  
16 229 inform the project manager in case of any adverse event during the trial via the designated hotline or by e-  
17  
18 230 mail.

17  
18 231 Participants are advised to continue use of PEP in the active intervention period of 30 days or at least for as  
19  
20 232 long as they still have respiratory symptoms. They receive daily text-messages administered as an automated  
21  
22 233 service by Twilio Inc. to prompt their reporting of CAT-scores by links to a questionnaire in REDCap. Also,  
23  
24 234 they are asked to report their present choice of airway resistance as well as the number of PEP flute sessions  
25  
26 235 the previous day. These daily self-reports constitute assessment of treatment adherence.

#### 26 236 **Usual care**

27  
28 237 As selfcare in Covid-19, the Danish Health Authorities recommend sufficient intake of liquid especially in  
29  
30 238 case of high body temperature; potential use of paracetamol when having myalgia, headache and fever; and a  
31  
32 239 throat lozenge in case of sore throat. Otherwise, the citizen with a positive SARS-CoV-2 test is requested to  
33  
34 240 perform self-quarantine and to pay special attention to hygiene and cleaning maintenance. The participants  
35  
36 241 in the usual care group also receive daily text-messages to prompt their reporting of CAT-scores by links to  
37  
38 242 the electronic questionnaire.

38  
39 243 To avoid attrition of the trial due to early recovery of symptoms, the project manager will contact the  
40  
41 244 participants in both allocation groups by phone or text message approximately on day 15 to ask about their  
42  
43 245 health condition and to answer to any potential concerns of continued participation in the trial. As part of the  
44  
45 246 trial information, the participants in both groups are advised to contact their general practitioner, the Covid-  
46  
47 247 19-specific clinics or the emergency medical services, if needed, as they would otherwise do if not  
48  
49 248 participating in the trial.

#### 48 249 **Measurements**

50  
51 250 Data is collected both through questionnaires (primary outcome) and as register data (see Table 2). With  
52  
53 251 consideration to the participants' possibly affection with sickness at inclusion point, the questionnaire at  
54  
55 252 baseline is deliberately delimited. The participants are asked about educational/professional background as  
56  
57 253 health care professionals have both higher incidence of Covid-19 and are presumably better qualified to  
58  
59 254 conduct disease selfcare than lay persons. Health literacy will be measured by the two dimensions  
60  
61 255 'Understanding' and 'Engagement' (five items each) derived from the multi-dimensional Health Literacy

60

1  
2  
3  
4 256 Questionnaire (HLQ™) and validated in a Danish general population survey.[22] The ‘Understanding’  
5  
6 257 dimension covers ‘understanding health information well enough to know what to do’, whereas  
7  
8 258 ‘Engagement’ covers ‘the ability to actively engage with healthcare providers’.[22] In addition to  
9 259 abovementioned topics, the participants are asked one single item of self-rated health (on a five-point Likert  
10  
11 260 scale) and a few questions about smoking and alcohol habits.

### 12 13 261 **Primary outcome**

14  
15 262 In the design phase of the trial, a valid Covid-19 symptom severity scale for outpatients was lacking and  
16  
17 263 emphasis was on the feasibility of the individual self-reporting symptoms while being sick with Covid-19.  
18 264 The COPD Assessment Test (CAT) is a validated questionnaire designed to evaluate symptoms in COPD  
19  
20 265 patients.[23] The CAT is free of use by courtesy of GlaxoSmithKline and is widely used both as a tele-  
21  
22 266 monitoring tool and to stratify the patients into groups based upon the severity of symptoms. Even among the  
23 267 patients in the most unstable phase of COPD, daily self-report of CAT is considered quick and easy for  
24  
25 268 patients to use.[24] The latter is important to ensure adequate data collection among the participants in the  
26 269 present trial. The eight items in the scale cover symptoms of cough, sputum, chest pain, dyspnoea, activities  
27  
28 270 of daily living at home, feeling safe at home despite symptoms (modified for the present study from feeling  
29 271 safe at leaving home despite symptoms), sleep quality and vigour. The eight items sum up to a range of 0-40  
30  
31 272 with higher scores indicating more symptom impairment. Although not validated for Covid-19 trials, the  
32  
33 273 CAT-scale is considered useful in the present study because several of the items (dyspnoea, cough, fatigue,  
34 274 sputum and pleuritic chest pain) previously have been used as outcome variables in pneumonia studies[25]  
35  
36 275 and Covid-19 convalescents report long term breathlessness, chest pain and fatigue.[26] Based upon  
37 276 anecdotal evidence, a single course of Covid-19 revealed changes in CAT-score from CAT=5 prior to onset  
38  
39 277 of symptoms to a peak of CAT=31 and a CAT=14 after a total of 40 days (personal communication).

40  
41 278 Although the change in CAT-score from baseline to follow-up at day 30 is the primary outcome, the CAT-  
42  
43 279 score as repeated daily measurements throughout the active intervention period of 30 days is supposed to  
44 280 contribute to a more thorough understanding of how the individual symptoms may intercorrelate and at what  
45  
46 281 point a potential effect of the PEP-flute intervention may initiate and peak.

### 47 48 282 **Secondary outcomes**

49  
50 283 The secondary outcomes are comparison between the intervention group and the usual care group of the  
51  
52 284 number of hospital admissions and use of antibiotics during the follow-up period. Presence of Covid-  
53  
54 285 symptoms day 30/90/180 and the CAT at day 90/180 will be assessed. Moreover, number of participants  
55 286 with serious adverse events (SAEs) during the 30-day intervention period will be evaluated. Finally,  
56  
57 287 potential sub-group effects by sex, age, comorbidity and body mass index (BMI) at study entry will be  
58 288 explored for all outcomes as various conditions and comorbidities such as diabetes, hypertension and other  
59  
60



1  
2  
3  
4  
5  
6  
7  
8  
9  
10  
11  
12  
13  
14  
15  
16  
17  
18  
19  
20  
21  
22  
23  
24  
25  
26  
27  
28  
29  
30  
31  
32  
33  
34  
35  
36  
37  
38  
39  
40  
41  
42  
43  
44  
45  
46  
47  
48  
49  
50  
51  
52  
53  
54  
55  
56  
57  
58  
59  
60

chronic diseases have been pointed out as prognostic risk factors.[5] Register data of diagnosed comorbidity will also be valuable in the interpretation of symptoms like dyspnoea and chest tightness which may be overlaps between an underlying disease like heart failure and the present course of Covid-19.

### Statistical plan and data analysis

Both intention-to-treat and per-protocol analyses will be performed. The intention-to-treat population consists of all randomised participants irrespective of whether the participant received study intervention or whether the participant complied to the study protocol in the treatment group to which the participant was assigned at randomisation. The per-protocol population is defined as participants with a baseline measure of primary outcome and a follow-up measure of primary outcome at the primary assessment call (day 30). As regards the intervention group, participants fulfil the per-protocol criteria if they have complied to the PEP flute-intervention for as long as respiratory symptoms are still reported in the CAT-score. These data are accessible through the daily self-reports. Participants in the usual care group fulfil the per-protocol criteria if they have no major protocol violations i.e. have not reported the use of a PEP-flute or treatment related to the respiratory system from a physiotherapist.

A statistical analysis plan that describes the details of the planned statistical analyses will be produced before last patient's last visit i.e. 30-day follow-up. Assessments of changes from baseline and construction of confidence intervals (CI) for continuous measures will be based on analysis of covariance (ANCOVA) including group as the main factor and baseline measure of outcome as covariate. Superiority will be claimed if the computed 95% CI of the estimated group difference in primary outcome does not include 0 in the ITT population. All statistical test will be two-sided and statistical significance will be claimed if the computed p-value is  $< 0.05$ .

Interactions between intervention status and baseline participant groupings i.e. sex and age will be prioritised as a priori subgroup analyses for the primary and secondary outcomes.

Determination of sample size according to the primary outcome i.e. the self-reported symptom CAT-score was based upon reported symptom scores in a previous study of community-acquired pneumonia.[25] On a 0-100 value scale (higher values indicate more symptoms), the mean symptom score at time of diagnosis was 51.7 (SD 20.1). We used these scores as reference. Hence, we assumed the mean CAT-score in the PEP-CoV-trial at baseline to be 20.0 (SD 10.0). A minimal clinical reported difference (MCID) of 2.0 on the CAT-scale has been reported from clinical studies of COPD rehabilitation.[27] Based on this MCID; the assumed mean CAT-score at baseline; a significance level of 5 % and a power of 0.8, we have estimated a need of including  $n > 141$  in each group. With consideration to potential dropouts in a heterogenous sample, we assess that inclusion of 200 participants in each intervention arm will be an adequate number. A mitigation strategy has been developed to be executed in case of recruitment problems. An interim analysis

1  
2  
3  
4 322 showed that the mean CAT = 12.8 (SD 12.5) at baseline after recruiting 109 participants. No other interim  
5  
6 323 analyses are planned. At present, the prevalence of hospital admission in Denmark is approximately 6 % and  
7  
8 324 as such, we should expect 30 participants being hospitalised during the active intervention period of 30 days.  
9 325 However, we have not estimated sample size based upon hospital admission as outcome variable.  
10

## 11 326 **ETHICS AND DISSEMINATION**

  
12

13 327 The use of PEP flute is considered a low risk intervention with no expected side effect. Since the  
14  
15 328 interventions will be delivered in combination with standard treatment and we will be closely monitoring  
16  
17 329 potential side effects, we anticipate no ethical issues. The intervention is considered justifiable in a health  
18 330 research ethics perspective. Ethical approval has been granted by the local Health Ethics Committee (Journal  
19  
20 331 number: H-20035929). The Danish Data Protection Agency has approved conduct of the trial (Capital  
21  
22 332 Region: P-2020-879). An inquiry about the study has been directed to the Danish Medicines Agency,  
23 333 because the PEP flute is classified as a medical device. No approval from the Agency is needed since the  
24  
25 334 flute is used for a purpose within the CE-classification (Agency reference number: 2020051572). It has not  
26 335 been a requirement to compose a data monitoring committee. The trial is exploratory with a design that  
27  
28 336 needs to adapt according to how the pandemic develops and the governmental countermeasures e.g. as  
29  
30 337 regards testing and restrictions. The trial is internally monitored, evaluated and adjusted accordingly.

31  
32 338 Prior to screening, all potential trial participants are informed, both orally and in writing, about the purpose  
33 339 of this trial, its process and potential risks, as well as costs and benefits of participation. After the  
34  
35 340 information is delivered, read and understood, voluntary informed consent is given by the participant by  
36 341 signing an e-consent form before trial participation can take place.  
37

38 342 Protocol deviations and adverse events (AEs) are recorded by the data collectors (AM and ASB). The  
39  
40 343 principal investigator and project manager (AM) monitor and do follow-up of possible AEs and serious  
41  
42 344 adverse events (SAEs) throughout the study. These procedures are qualified by use of templates from the  
43 345 Danish GCP-units.[28]  
44

## 45 346 **POTENTIAL OUTCOMES AND IMPACT**

  
46

47  
48 347 The PEP-CoV project is an innovative project niched between screening / prevention through vaccine and  
49 348 hospitalisation / critical illness treatment. This is an important area that, to the best of our knowledge, has  
50  
51 349 received limited attention from both research and Health Authorities. Coronavirus will continue to be present  
52  
53 350 for the next several years. Thus, many people will become infected by the virus and develop Covid-19 and as  
54 351 a worldwide response to the pandemic, we need to focus upon selfcare. The PEP-CoV trial aims to prevent  
55  
56 352 serious lung disease and possibly shorten the course of the disease with the use of a simple, cheap and  
57 353 accessible intervention, a PEP flute.  
58  
59  
60

1  
2  
3  
4 354 It is difficult to estimate how many hospitalisations among the group of people having Covid-19 could have  
5  
6 355 avoided by the individual's use of a PEP flute. However, a PEP flute including postal deliverance costs  
7  
8 356 approximately 10 €; a regular hospital bed costs around 1000 € a day, whereas an ICU-bed usually costs 2.-  
9 357 5.000 € a day. The PEP flute-selfcare intervention is feasible and easy to use. If it proves to be effective, it  
10  
11 358 will be easy to implement as a public health intervention. This may result in less sick leave and less strain for  
12 359 the individual and the family. Moreover, potentially less severe courses of Covid-19 will reduce the overall  
13  
14 360 burden of the health care system and the society whereby we can ensure continued normal high activity in  
15 361 the health care system. Handling the PEP flute as a selfcare tool during quarantine in one's own home may  
16  
17 362 contribute to a sense of mastery and coping to potentially impact the course of disease through selfcare.  
18  
19 363 These latter perspectives may be explored subsequently in a qualitative study design.

20  
21 364 According to the ethical approval, the trial is obliged to recruit by a single invitation letter only, sent to the  
22 365 individual's official e-Boks and then await a request for further contact from the eligible participant. Many  
23  
24 366 people check their e-Boks only occasionally. Other eligible participants may feel too sick to overcome this  
25  
26 367 task. Hence, a large sample of individuals tested positive for SARS-CoV-2 will be invited to the trial with  
27 368 only very few to ask for contact. This may challenge a non-selective recruitment although the inclusion  
28  
29 369 criteria are fewer than in many other randomised controlled trials.

30  
31 370 Although warranted, it is not possible to deliver a placebo PEP flute-intervention. Thus, blinding of the  
32  
33 371 patients and treatment providers is not feasible. Because the Covid-19 is a novel disease, this study is  
34 372 explorative in relation to using self-reported measurements from COPD-treatment i.e. the CAT-score as the  
35  
36 373 primary outcome variable. In the design process, it was considered to add objective measures like oxygen  
37 374 saturation, body temperature and/or infectious biomarkers as outcome variables. However, the quarantine  
38  
39 375 restrictions made this choice not feasible and the subsequent implementation of potential positive findings in  
40 376 a public health context advocated for the opt-out of objective measures. However, these issues of both the  
41  
42 377 CAT as outcome measure and the lack of objective measures call for attention in the later discussion of the  
43  
44 378 results of the trial.

45  
46 379 There is a risk of contamination across arms as participants can acquire the PEP flute as over-the-counter  
47 380 medical equipment. The participants are asked at follow-up, if they have used a PEP flute and/or have  
48  
49 381 received any physiotherapeutic treatment. As data will be analysed both as regards intention-to-treat and per-  
50  
51 382 protocol, this will be directed in the interpretation of the results.

### 52 53 383 **Trial status**

54 384 At submission of this manuscript, recruitment to the trial is ongoing with a total of 375 participants enrolled.  
55  
56 385 The protocol was first prospectively registered [www.ClinicalTrials.gov](http://www.ClinicalTrials.gov) (NCT04530435) on August 27,  
57  
58 386 2020. No amendments have been made to the protocol (version 3.0 July 14, 2020) since recruitment of the  
59 387 first participant. Minor amendments have been made to the registration December 16, 2020, with  
60

1  
2  
3  
4 388 clarification of outcome measurements (general and respiratory symptoms). Recruitment was started on  
5  
6 389 October 6, 2020 and the first participant was enrolled on this date as well. Data of test-positive individuals  
7  
8 390 are provided from the beforementioned four microbiological departments. Recruitment was initiated based  
9  
10 391 upon data from only one of the departments in the Capital Region to ensure feasibility of the data  
11  
12 392 management process. One by one the other departments were enrolled and since end of October, we have  
13  
14 393 obtained data of all individuals with tests analysed by the regional microbiological departments of the two  
15  
16 394 regions.

#### 16 395 **Authors' contributions**

17  
18 396 AM forwarded the idea and MKS gathered the project team. AM, MKS, SCL, MH, LMK, NW and BLH all  
19  
20 397 contributed to the study conception and design. AM is the project manager. LMK steered the production of  
21  
22 398 instruction videos. ASB steered the setup of data management system supervised by MH. AM and ASB both  
23  
24 400 handle recruitment, data collection, deliverance of intervention and assessment of all participants. AM  
25  
26 401 handles the hotline and request of advice from participants including any adverse events. MH developed the  
27  
28 402 allocation sequence. SCL manages data and statistical analysis. NW has the medical responsibility in  
29  
30 403 conduct of the trial and BLH is project lead. AM drafted the manuscript and all authors commented on  
31  
32 404 previous versions of the manuscript. All authors read and approved the final manuscript. All authors will  
33  
34 405 contribute to the subsequent publication of findings according to the guidelines set forth by the International  
35  
36 406 Committee of Medical Journal Editors. No professional writers will be part of the reporting and publication  
37  
38 of the results from the PEP-CoV trial.

#### 36 407 **Competing interests**

37  
38 408 None of the authors declared any conflict of interest.

#### 40 409 **Acknowledgments**

41  
42  
43 410 By sharing their experiences of disease course, the Covid-19 convalescents are both acknowledged for  
44  
45 411 valuable contributions to the trial design.

#### 46 412 **Funding**

47  
48  
49 413 This work was supported by Innovation Fund Denmark (grant number 0211-00023B) and a grant  
50  
51 414 (unnumbered) from the Danish Nursing Council. The Parker Institute, Bispebjerg and Frederiksberg Hospital  
52  
53 415 is supported by a core grant from the Oak Foundation. The funders have no role in the design, conduct,  
54  
55 416 collection of data, analysis, writing, or reporting of the trial.  
56  
57 417  
58  
59  
60

1  
2  
3  
4 419 **REFERENCES**

- 7 420 1 Phua J, Weng L, Ling L, *et al*. Intensive care management of coronavirus disease 2019 (COVID-19):  
8 421 challenges and recommendations. *Lancet Respir Med* 2020;**8**:506–17. doi:10.1016/S2213-  
10 422 2600(20)30161-2
- 12 423 2 Reilev M, Kristensen KB, Pottegård A, *et al*. Characteristics and predictors of hospitalization and  
13 424 death in the first 9,519 cases with a positive RT-PCR test for SARS-CoV-2 in Denmark: A  
15 425 nationwide cohort. *medRxiv* Published Online First: 2020. doi:10.1101/2020.05.24.20111823
- 17 426 3 Haase N, Plovsing R, Christensen S, *et al*. Characteristics, interventions, and longer term outcomes of  
18 427 COVID-19 ICU patients in Denmark—A nationwide, observational study. *Acta Anaesthesiol Scand*  
20 428 2021;**65**:68–75. doi:10.1111/aas.13701
- 21 429 4 WHO. Covid-19: icd-10 coding guidance 1 18. 2020. <https://www.who.int/classifications/icd/COVID-19-coding-icd10.pdf> (accessed 12 Feb 2021).
- 24 431 5 Docherty AB, Harrison EM, Green CA, *et al*. Features of 20 133 UK patients in hospital with covid-  
26 432 19 using the ISARIC WHO Clinical Characterisation Protocol: prospective observational cohort  
28 433 study. *BMJ Br Med journal* 2020;**369**:m1985. doi:10.1136/bmj.m1985
- 29 434 6 Beigel JH, Tomashek KM, Dodd LE, *et al*. Remdesivir for the Treatment of Covid-19 — Final  
31 435 Report. *N Engl J Med* 2020;**383**:1813–26. doi:10.1056/nejmoa2007764
- 32 436 7 Group TRC. Dexamethasone in Hospitalized Patients with Covid-19 — Preliminary Report. *N Engl J*  
34 437 *Med* 2020;:1–11. doi:10.1056/nejmoa2021436
- 35 438 8 Kofod LM, Jeschke KN, Krogh-Madsen R, *et al*. Kontinuerlig CPAP til patienter Kontinuerlig CPAP  
37 439 til patienter med COVID-19 med COVID-19. *Ugeskr Læger* 2020;:1–8. [article in Danish]
- 39 440 9 Radovanovic D, Rizzi M, Pini S, *et al*. Helmet CPAP to Treat Acute Hypoxemic Respiratory Failure  
40 441 in Patients with COVID-19: A Management Strategy Proposal. *J Clin Med* 2020;**9**:1191.  
42 442 doi:10.3390/jcm9041191
- 43 443 10 Osadnik CR, McDonald CF, Miller BR, *et al*. The effect of positive expiratory pressure (PEP)  
45 444 therapy on symptoms, quality of life and incidence of re-exacerbation in patients with acute  
46 445 exacerbations of chronic obstructive pulmonary disease: a multicentre, randomised controlled trial.  
48 446 *Thorax* 2014;**69**:137-143. doi:10.1136/thoraxjnl-2013-203425
- 49 447 11 Møller T, Moser C, Adamsen L, *et al*. Early warning and prevention of pneumonia in acute leukemia  
51 448 by patient education, spirometry, and positive expiratory pressure: A randomized controlled trial. *Am*  
52 449 *J Hematol* 2016;**91**:271–6. doi:10.1002/ajh.24262
- 54 450 12 Olsén MF, Lannefors L, Westerdahl E. Positive expiratory pressure – Common clinical applications  
56 451 and physiological effects. *Respiratory Medicine* 2015;**109**:297-307. doi:10.1016/j.rmed.2014.11.003
- 57 452 13 O’Neill K, O’Donnell AE, Bradley JM. Airway clearance, mucoactive therapies and pulmonary  
59 453 rehabilitation in bronchiectasis. *Respirology* 2019;**24**:227–37. doi:10.1111/resp.13459
- 60



1  
2  
3  
4  
5  
6  
7  
8  
9  
10  
11  
12  
13  
14  
15  
16  
17  
18  
19  
20  
21  
22  
23  
24  
25  
26  
27  
28  
29  
30  
31  
32  
33  
34  
35  
36  
37  
38  
39  
40  
41  
42  
43  
44  
45  
46  
47  
48  
49  
50  
51  
52  
53  
54  
55  
56  
57  
58  
59  
60

- 454 14 Chan AW, Tetzlaff JM, Gøtzsche PC, *et al.* SPIRIT 2013 explanation and elaboration: guidance for protocols of clinical trials. *BMJ* 2013;**346**:1–42. doi:10.1136/bmj.e7586
- 456 15 Sudre CH, Murray B, Varsavsky T, *et al.* Attributes and predictors of Long-COVID: analysis of COVID cases and their symptoms collected by the Covid symptoms Study App. *medRxiv Prepr* Published Online First: 2020. <https://doi.org/10.1101/2020.10.19.20214494>
- 459 16 SSI. Covid-19 i Danmark. Epidemiologisk trend og fokus: Symptomer. Copenhagen: 2020. [report in Danish]
- 461 17 Petersen I, Phillips A. Three quarters of people with SARS-CoV-2 infection are asymptomatic: Analysis of english household survey data. *Clin Epidemiol* 2020;**12**:1039–43. doi:10.2147/CLEP.S276825
- 464 18 SSI. COVIDmeter. <https://covid19.ssi.dk/overvagningsdata/undersogelser/covidmeter> (accessed 4 Feb 2021). [report in Danish]
- 466 19 Harris PA, Taylor R, Thielke R, *et al.* Research electronic data capture (REDCap)-A metadata-driven methodology and workflow process for providing translational research informatics support. *J Biomed Inform* 2009;**42**:377–81. doi:10.1016/j.jbi.2008.08.010
- 469 20 Osadnik CR, McDonald CF, Jones AP, *et al.* Airway clearance techniques for chronic obstructive pulmonary disease. *Cochrane Database Syst Rev* Published Online First: 2012. doi:10.1002/14651858.cd008328.pub2
- 472 21 Smith JA, Aliverti A, Quaranta M, *et al.* Chest wall dynamics during voluntary and induced cough in healthy volunteers. *J Physiol* 2012;**590**:563–74. doi:10.1113/jphysiol.2011.213157
- 474 22 Bo A, Friis K, Osborne RH, *et al.* National indicators of health literacy: Ability to understand health information and to engage actively with healthcare providers - A populationbased survey among Danish adults. *BMC Public Health* 2014;**14**:1–12. doi:10.1186/1471-2458-14-1095
- 477 23 Jones PW, Harding G, Berry P, *et al.* Development and first validation of the COPD Assessment Test. *Eur Respir J* 2009;**34**:648–54. doi:10.1183/09031936.00102509
- 479 24 Region Sjælland. Sundhedsfagligt indhold i TeleKol. 2017. [https://www.regionsjaelland.dk/Sundhed/samarbejde-og-indsatser/Telesundhed-KOL/Documents/TeleKOL\\_LANDSDEL\\_SJÆLLANDS\\_sundhedsfaglige\\_anbefalinger\\_v1.01.pdf](https://www.regionsjaelland.dk/Sundhed/samarbejde-og-indsatser/Telesundhed-KOL/Documents/TeleKOL_LANDSDEL_SJÆLLANDS_sundhedsfaglige_anbefalinger_v1.01.pdf) [guidelines in Danish]
- 483 25 Metlay JP, Fine MJ, Schulz R, *et al.* Measuring symptomatic and functional recovery in patients with community-acquired pneumonia. *J Gen Intern Med* 1997;**12**:423–30. doi:10.1046/j.1525-1497.1997.00074.x
- 486 26 Andersen KJ. Åndenød på 8. uge. *Sygeplejersken* 2020;**6**:50-51. [article in Danish]
- 487 27 Jones P, Jenkins C, Agusti A. *et al.* Healthcare Professional User Guide. 2018;1-20. [www.catestonline.org](http://www.catestonline.org) (The COPD Assessment Test (CAT) accessed 1 Mar 2021)

1  
2  
3  
4  
5  
6  
7  
8  
9  
10  
11  
12  
13  
14  
15  
16  
17  
18  
19  
20  
21  
22  
23  
24  
25  
26  
27  
28  
29  
30  
31  
32  
33  
34  
35  
36  
37  
38  
39  
40  
41  
42  
43  
44  
45  
46  
47  
48  
49  
50  
51  
52  
53  
54  
55  
56  
57  
58  
59  
60

489 28 GCP-units. The Danish Good Clinical Practice Units. <https://gcp-enhed.dk/english/> (accessed 16 Feb  
490 2021).

## LEGENDS

493 Figure 1: Relationship between population/setting and level of care/treatment options of SARS-CoV-2 and  
494 Covid-19. Upwards arrows indicate disease trajectory and higher level of care accordingly (to the left) and  
495 add-ons of treatment options (right side). Abbreviations: PEEP, positive end expiratory pressure; FiO<sub>2</sub>,  
496 inspired oxygen fraction; NIV, non-invasive ventilation; ECMO, extracorporeal membrane oxygenation;  
497 CPAP, continuous positive airway pressure

498 Figure 2: Still-photos from instruction videos about PEP flute usage and hygienic maintenance.  
499 In details, 2a: how to use the PEP flute; 2b: how to assemble the three parts of the flute correctly; 2c: how to  
500 choose the suitable resistance, and 2d: how to perform hygienic maintenance of the PEP flute. Both videos  
501 including the shown subtitles in Danish are produced by the Department of Communication at Copenhagen  
502 University Hospital Hvidovre

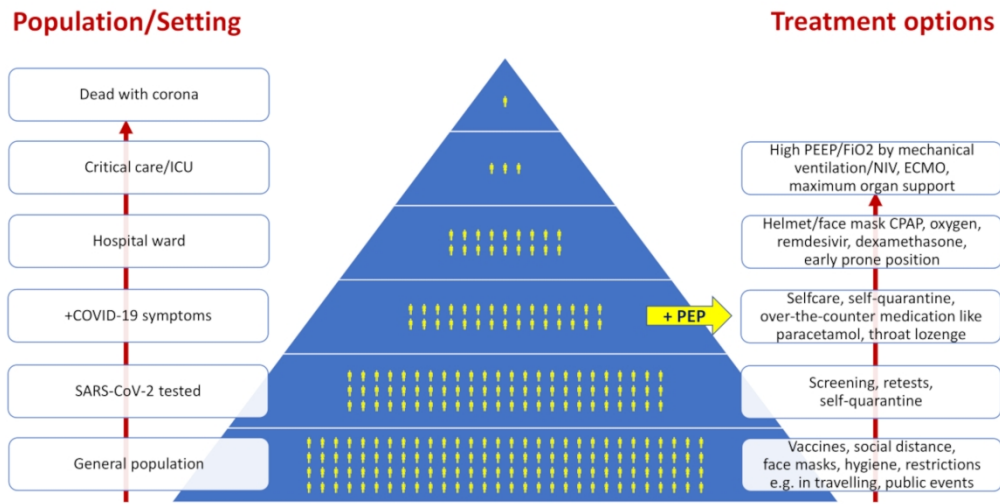

Figure 1: Relationship between population/setting and level of care/treatment options of SARS-CoV-2 and Covid-19. Upwards arrows indicate disease trajectory and higher level of care accordingly (to the left) and add-ons of treatment options (right side). Abbreviations: PEEP, positive end expiratory pressure; FiO<sub>2</sub>, inspired oxygen fraction; NIV, non-invasive ventilation; ECMO, extracorporeal membrane oxygenation; CPAP, continuous positive airway pressure

190x107mm (300 x 300 DPI)



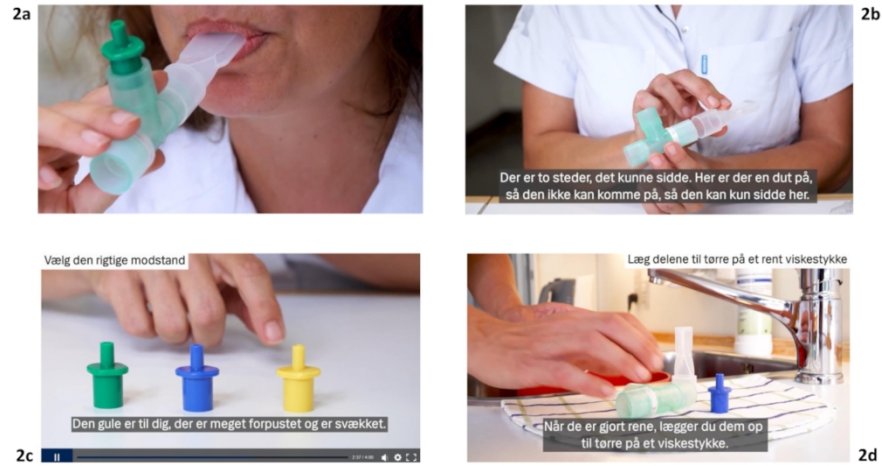

Figure 2: Still-photos from instruction videos about PEP flute usage and hygienic maintenance. In details, 2a: how to use the PEP flute; 2b: how to assemble the three parts of the flute correctly; 2c: how to choose the suitable resistance, and 2d: how to perform hygienic maintenance of the PEP flute. Both videos including the shown subtitles in Danish are produced by the Department of Communication at Copenhagen University Hospital Hvidovre

190x107mm (300 x 300 DPI)

The PEP-CoV protocol: a PEP flute-selfcare randomised controlled trial to prevent respiratory deterioration and hospitalisation in SARS-CoV-2 infected individuals with Covid-19 symptoms

# Reporting checklist for protocol of a clinical trial.

Based on the SPIRIT guidelines.

## Instructions to authors

Complete this checklist by entering the page numbers from your manuscript where readers will find each of the items listed below.

Your article may not currently address all the items on the checklist. Please modify your text to include the missing information. If you are certain that an item does not apply, please write "n/a" and provide a short explanation.

Upload your completed checklist as an extra file when you submit to a journal.

In your methods section, say that you used the SPIRIT reporting guidelines, and cite them as:

Chan A-W, Tetzlaff JM, Gøtzsche PC, Altman DG, Mann H, Berlin J, Dickersin K, Hróbjartsson A, Schulz KF, Parulekar WR, Krleža-Jerić K, Laupacis A, Moher D. SPIRIT 2013 Explanation and Elaboration: Guidance for protocols of clinical trials. *BMJ*. 2013;346:e7586

|                                   | Reporting Item                                                                                                                  | Page Number |
|-----------------------------------|---------------------------------------------------------------------------------------------------------------------------------|-------------|
| <b>Administrative information</b> |                                                                                                                                 |             |
| Title                             | <a href="#">#1</a> Descriptive title identifying the study design, population, interventions, and, if applicable, trial acronym | 1           |

The PEP-CoV protocol: a PEP fluoride-selfcare randomised controlled trial to prevent respiratory deterioration and hospitalisation in SARS-CoV-2 infected individuals with Covid-19 symptoms

|    |                     |                     |                                                  |           |
|----|---------------------|---------------------|--------------------------------------------------|-----------|
| 1  |                     |                     |                                                  |           |
| 2  |                     |                     |                                                  |           |
| 3  |                     |                     |                                                  |           |
| 4  | Trial registration  | <a href="#">#2a</a> | Trial identifier and registry name. If not yet   | 2 + 7     |
| 5  |                     |                     | registered, name of intended registry            |           |
| 6  |                     |                     |                                                  |           |
| 7  |                     |                     |                                                  |           |
| 8  |                     |                     |                                                  |           |
| 9  | Trial registration: | <a href="#">#2b</a> | All items from the World Health Organization     | 7         |
| 10 |                     |                     |                                                  |           |
| 11 | data set            |                     | Trial Registration Data Set                      |           |
| 12 |                     |                     |                                                  |           |
| 13 |                     |                     |                                                  |           |
| 14 | Protocol version    | <a href="#">#3</a>  | Date and version identifier                      | 14        |
| 15 |                     |                     |                                                  |           |
| 16 |                     |                     |                                                  |           |
| 17 | Funding             | <a href="#">#4</a>  | Sources and types of financial, material, and    | 7 + 15    |
| 18 |                     |                     | other support                                    |           |
| 19 |                     |                     |                                                  |           |
| 20 |                     |                     |                                                  |           |
| 21 |                     |                     |                                                  |           |
| 22 |                     |                     |                                                  |           |
| 23 | Roles and           | <a href="#">#5a</a> | Names, affiliations, and roles of protocol       | 1 + 14-15 |
| 24 |                     |                     |                                                  |           |
| 25 | responsibilities:   |                     | contributors                                     |           |
| 26 |                     |                     |                                                  |           |
| 27 | contributorship     |                     |                                                  |           |
| 28 |                     |                     |                                                  |           |
| 29 |                     |                     |                                                  |           |
| 30 | Roles and           | <a href="#">#5b</a> | Name and contact information for the trial       | 1 + 7     |
| 31 |                     |                     |                                                  |           |
| 32 | responsibilities:   |                     | sponsor                                          |           |
| 33 |                     |                     |                                                  |           |
| 34 | sponsor contact     |                     |                                                  |           |
| 35 |                     |                     |                                                  |           |
| 36 |                     |                     |                                                  |           |
| 37 | information         |                     |                                                  |           |
| 38 |                     |                     |                                                  |           |
| 39 |                     |                     |                                                  |           |
| 40 | Roles and           | <a href="#">#5c</a> | Role of study sponsor and funders, if any, in    | 15        |
| 41 |                     |                     |                                                  |           |
| 42 | responsibilities:   |                     | study design; collection, management,            |           |
| 43 |                     |                     |                                                  |           |
| 44 | sponsor and funder  |                     | analysis, and interpretation of data; writing of |           |
| 45 |                     |                     |                                                  |           |
| 46 |                     |                     |                                                  |           |
| 47 |                     |                     | the report; and the decision to submit the       |           |
| 48 |                     |                     |                                                  |           |
| 49 |                     |                     | report for publication, including whether they   |           |
| 50 |                     |                     |                                                  |           |
| 51 |                     |                     | will have ultimate authority over any of these   |           |
| 52 |                     |                     |                                                  |           |
| 53 |                     |                     | activities                                       |           |
| 54 |                     |                     |                                                  |           |
| 55 |                     |                     |                                                  |           |
| 56 |                     |                     |                                                  |           |
| 57 |                     |                     |                                                  |           |
| 58 |                     |                     |                                                  |           |
| 59 |                     |                     |                                                  |           |
| 60 |                     |                     |                                                  |           |

The PEP-CoV protocol: a PEP flute-selfcare randomised controlled trial to prevent respiratory deterioration and hospitalisation in SARS-CoV-2 infected individuals with Covid-19 symptoms

|    |                      |                     |                                                     |
|----|----------------------|---------------------|-----------------------------------------------------|
| 1  |                      |                     |                                                     |
| 2  |                      |                     |                                                     |
| 3  |                      |                     |                                                     |
| 4  | Roles and            | <a href="#">#5d</a> | Composition, roles, and responsibilities of the     |
| 5  | responsibilities:    |                     | coordinating centre, steering committee,            |
| 6  |                      |                     | endpoint adjudication committee, data               |
| 7  | committees           |                     | management team, and other individuals or           |
| 8  |                      |                     | groups overseeing the trial, if applicable (see     |
| 9  |                      |                     | Item 21a for data monitoring committee)             |
| 10 |                      |                     |                                                     |
| 11 |                      |                     |                                                     |
| 12 |                      |                     |                                                     |
| 13 |                      |                     |                                                     |
| 14 |                      |                     |                                                     |
| 15 |                      |                     |                                                     |
| 16 |                      |                     |                                                     |
| 17 |                      |                     |                                                     |
| 18 | <b>Introduction</b>  |                     |                                                     |
| 19 |                      |                     |                                                     |
| 20 |                      |                     |                                                     |
| 21 | Background and       | <a href="#">#6a</a> | Description of research question and                |
| 22 | rationale            |                     | justification for undertaking the trial, including  |
| 23 |                      |                     | summary of relevant studies (published and          |
| 24 |                      |                     | unpublished) examining benefits and harms           |
| 25 |                      |                     | for each intervention                               |
| 26 |                      |                     |                                                     |
| 27 |                      |                     |                                                     |
| 28 |                      |                     |                                                     |
| 29 |                      |                     |                                                     |
| 30 |                      |                     |                                                     |
| 31 |                      |                     |                                                     |
| 32 |                      |                     |                                                     |
| 33 | Background and       | <a href="#">#6b</a> | Explanation for choice of comparators               |
| 34 | rationale: choice of |                     |                                                     |
| 35 | comparators          |                     |                                                     |
| 36 |                      |                     |                                                     |
| 37 |                      |                     |                                                     |
| 38 |                      |                     |                                                     |
| 39 |                      |                     |                                                     |
| 40 |                      |                     |                                                     |
| 41 | Objectives           | <a href="#">#7</a>  | Specific objectives or hypotheses                   |
| 42 |                      |                     |                                                     |
| 43 |                      |                     |                                                     |
| 44 | Trial design         | <a href="#">#8</a>  | Description of trial design including type of trial |
| 45 |                      |                     | (eg, parallel group, crossover, factorial, single   |
| 46 |                      |                     | group), allocation ratio, and framework (eg,        |
| 47 |                      |                     | superiority, equivalence, non-inferiority,          |
| 48 |                      |                     | exploratory)                                        |
| 49 |                      |                     |                                                     |
| 50 |                      |                     |                                                     |
| 51 |                      |                     |                                                     |
| 52 |                      |                     |                                                     |
| 53 |                      |                     |                                                     |
| 54 |                      |                     |                                                     |
| 55 |                      |                     |                                                     |
| 56 |                      |                     |                                                     |
| 57 |                      |                     |                                                     |
| 58 |                      |                     |                                                     |
| 59 |                      |                     |                                                     |
| 60 |                      |                     |                                                     |

The PEP-CoV protocol: a PEP flute-selfcare randomised controlled trial to prevent respiratory deterioration and hospitalisation in SARS-CoV-2 infected individuals with Covid-19 symptoms

## Methods:

### Participants, interventions, and outcomes

|                                 |                      |                                                                                                                                                                                                  |      |
|---------------------------------|----------------------|--------------------------------------------------------------------------------------------------------------------------------------------------------------------------------------------------|------|
| Study setting                   | <a href="#">#9</a>   | Description of study settings (eg, community clinic, academic hospital) and list of countries where data will be collected. Reference to where list of study sites can be obtained               | 6-7  |
| Eligibility criteria            | <a href="#">#10</a>  | Inclusion and exclusion criteria for participants. If applicable, eligibility criteria for study centres and individuals who will perform the interventions (eg, surgeons, psychotherapists)     | 7-9  |
| Interventions:<br>description   | <a href="#">#11a</a> | Interventions for each group with sufficient detail to allow replication, including how and when they will be administered                                                                       | 9-10 |
| Interventions:<br>modifications | <a href="#">#11b</a> | Criteria for discontinuing or modifying allocated interventions for a given trial participant (eg, drug dose change in response to harms, participant request, or improving / worsening disease) | 9-10 |
| Interventions:<br>adherence     | <a href="#">#11c</a> | Strategies to improve adherence to intervention protocols, and any procedures for                                                                                                                | 10   |

The PEP-CoV protocol: a PEP flute-selfcare randomised controlled trial to prevent respiratory deterioration and hospitalisation in SARS-CoV-2 infected individuals with Covid-19 symptoms

monitoring adherence (eg, drug tablet return; laboratory tests)

|                                    |                      |                                                                                                                                                                                                                                                                                                                                                                                |           |
|------------------------------------|----------------------|--------------------------------------------------------------------------------------------------------------------------------------------------------------------------------------------------------------------------------------------------------------------------------------------------------------------------------------------------------------------------------|-----------|
| Interventions:<br>concomitant care | <a href="#">#11d</a> | Relevant concomitant care and interventions that are permitted or prohibited during the trial                                                                                                                                                                                                                                                                                  | 10-12     |
| Outcomes                           | <a href="#">#12</a>  | Primary, secondary, and other outcomes, including the specific measurement variable (eg, systolic blood pressure), analysis metric (eg, change from baseline, final value, time to event), method of aggregation (eg, median, proportion), and time point for each outcome. Explanation of the clinical relevance of chosen efficacy and harm outcomes is strongly recommended | 7 + 10-12 |
| Participant timeline               | <a href="#">#13</a>  | Time schedule of enrolment, interventions (including any run-ins and washouts), assessments, and visits for participants. A schematic diagram is highly recommended (see Figure)                                                                                                                                                                                               | 8         |
| Sample size                        | <a href="#">#14</a>  | Estimated number of participants needed to achieve study objectives and how it was determined, including clinical and statistical assumptions supporting any sample size calculations                                                                                                                                                                                          | 12        |

The PEP-CoV protocol: a PEP flute-selfcare randomised controlled trial to prevent respiratory deterioration and hospitalisation in SARS-CoV-2 infected individuals with Covid-19 symptoms

1  
2  
3 Recruitment [#15](#) Strategies for achieving adequate participant 8 + 13  
4 enrolment to reach target sample size  
5  
6  
7

8  
9 **Methods:**

10  
11 **Assignment of**  
12  
13 **interventions (for**  
14  
15 **controlled trials)**

16  
17  
18 Allocation: [#16a](#) Method of generating the allocation sequence 9  
19 sequence (eg, computer-generated random numbers),  
20 and list of any factors for stratification. To  
21 reduce predictability of a random sequence,  
22 details of any planned restriction (eg, blocking)  
23 should be provided in a separate document  
24 that is unavailable to those who enrol  
25 participants or assign interventions  
26  
27  
28  
29  
30  
31  
32  
33  
34  
35  
36

37 Allocation [#16b](#) Mechanism of implementing the allocation 9  
38 concealment sequence (eg, central telephone; sequentially  
39 numbered, opaque, sealed envelopes),  
40 describing any steps to conceal the sequence  
41 until interventions are assigned  
42  
43  
44  
45  
46  
47  
48  
49

50 Allocation: [#16c](#) Who will generate the allocation sequence, 9 + 15  
51 implementation who will enrol participants, and who will assign  
52 participants to interventions  
53  
54  
55  
56  
57  
58  
59  
60

The PEP-CoV protocol: a PEP flute-selfcare randomised controlled trial to prevent respiratory deterioration and hospitalisation in SARS-CoV-2 infected individuals with Covid-19 symptoms

1  
2  
3  
4 Blinding (masking) [#17a](#) Who will be blinded after assignment to 9 + 14  
5  
6 interventions (eg, trial participants, care  
7  
8 providers, outcome assessors, data analysts),  
9  
10 and how  
11  
12

13 Blinding (masking): [#17b](#) If blinded, circumstances under which n/a: Open-label trial  
14  
15 emergency unblinding is permissible, and procedure for with no blinding  
16  
17 unblinding revealing a participant's allocated intervention  
18  
19 during the trial  
20  
21  
22

23 **Methods: Data**  
24  
25 **collection,**  
26  
27 **management, and**  
28  
29 **analysis**  
30  
31  
32

33 Data collection plan [#18a](#) Plans for assessment and collection of 10-12  
34  
35 outcome, baseline, and other trial data,  
36  
37 including any related processes to promote  
38  
39 data quality (eg, duplicate measurements,  
40  
41 training of assessors) and a description of  
42  
43 study instruments (eg, questionnaires,  
44  
45 laboratory tests) along with their reliability and  
46  
47 validity, if known. Reference to where data  
48  
49 collection forms can be found, if not in the  
50  
51 protocol  
52  
53  
54  
55  
56  
57  
58  
59  
60



The PEP-CoV protocol: a PEP flute-selfcare randomised controlled trial to prevent respiratory deterioration and hospitalisation in SARS-CoV-2 infected individuals with Covid-19 symptoms

|                                                                                        |                                                  |                      |                                                                                                                                                                                                                                                                   |                                                                 |
|----------------------------------------------------------------------------------------|--------------------------------------------------|----------------------|-------------------------------------------------------------------------------------------------------------------------------------------------------------------------------------------------------------------------------------------------------------------|-----------------------------------------------------------------|
| 1<br>2<br>3<br>4<br>5<br>6<br>7<br>8<br>9<br>10<br>11<br>12<br>13<br>14                | Data collection plan: retention                  | <a href="#">#18b</a> | Plans to promote participant retention and complete follow-up, including list of any outcome data to be collected for participants who discontinue or deviate from intervention protocols                                                                         | 10-12                                                           |
| 15<br>16<br>17<br>18<br>19<br>20<br>21<br>22<br>23<br>24<br>25<br>26<br>27<br>28<br>29 | Data management                                  | <a href="#">#19</a>  | Plans for data entry, coding, security, and storage, including any related processes to promote data quality (eg, double data entry; range checks for data values). Reference to where details of data management procedures can be found, if not in the protocol | 9-12                                                            |
| 30<br>31<br>32<br>33<br>34<br>35<br>36<br>37<br>38<br>39                               | Statistics: outcomes                             | <a href="#">#20a</a> | Statistical methods for analysing primary and secondary outcomes. Reference to where other details of the statistical analysis plan can be found, if not in the protocol                                                                                          | 11-12: A statistical analysis plan will be amended the protocol |
| 40<br>41<br>42<br>43<br>44<br>45<br>46<br>47                                           | Statistics: additional analyses                  | <a href="#">#20b</a> | Methods for any additional analyses (eg, subgroup and adjusted analyses)                                                                                                                                                                                          | Will be described in the statistical analysis plan              |
| 48<br>49<br>50<br>51<br>52<br>53<br>54<br>55<br>56<br>57<br>58<br>59<br>60             | Statistics: analysis population and missing data | <a href="#">#20c</a> | Definition of analysis population relating to protocol non-adherence (eg, as randomised analysis), and any statistical methods to handle missing data (eg, multiple imputation)                                                                                   | Will be described in the statistical analysis plan              |

The PEP-CoV protocol: a PEP flute-selfcare randomised controlled trial to prevent respiratory deterioration and hospitalisation in SARS-CoV-2 infected individuals with Covid-19 symptoms

## Methods:

### Monitoring

|                                      |                                                                                                                                                                                                                                                                                                                                                            |            |
|--------------------------------------|------------------------------------------------------------------------------------------------------------------------------------------------------------------------------------------------------------------------------------------------------------------------------------------------------------------------------------------------------------|------------|
| Data monitoring:<br>formal committee | <a href="#">#21a</a> Composition of data monitoring committee (DMC); summary of its role and reporting structure; statement of whether it is independent from the sponsor and competing interests; and reference to where further details about its charter can be found, if not in the protocol. Alternatively, an explanation of why a DMC is not needed | 13         |
| Data monitoring:<br>interim analysis | <a href="#">#21b</a> Description of any interim analyses and stopping guidelines, including who will have access to these interim results and make the final decision to terminate the trial                                                                                                                                                               | 12         |
| Harms                                | <a href="#">#22</a> Plans for collecting, assessing, reporting, and managing solicited and spontaneously reported adverse events and other unintended effects of trial interventions or trial conduct                                                                                                                                                      | 10-11 + 13 |
| Auditing                             | <a href="#">#23</a> Frequency and procedures for auditing trial conduct, if any, and whether the process will be independent from investigators and the sponsor                                                                                                                                                                                            | 13         |

The PEP-CoV protocol: a PEP flute-selfcare randomised controlled trial to prevent respiratory deterioration and hospitalisation in SARS-CoV-2 infected individuals with Covid-19 symptoms

## Ethics and dissemination

|                                      |                      |                                                                                                                                                                                                                                    |                                                                  |
|--------------------------------------|----------------------|------------------------------------------------------------------------------------------------------------------------------------------------------------------------------------------------------------------------------------|------------------------------------------------------------------|
| Research ethics approval             | <a href="#">#24</a>  | Plans for seeking research ethics committee / institutional review board (REC / IRB) approval                                                                                                                                      | 7 + 12: The trial is approved                                    |
| Protocol amendments                  | <a href="#">#25</a>  | Plans for communicating important protocol modifications (eg, changes to eligibility criteria, outcomes, analyses) to relevant parties (eg, investigators, REC / IRBs, trial participants, trial registries, journals, regulators) | 13-14                                                            |
| Consent or assent                    | <a href="#">#26a</a> | Who will obtain informed consent or assent from potential trial participants or authorised surrogates, and how (see Item 32)                                                                                                       | 13-15                                                            |
| Consent or assent: ancillary studies | <a href="#">#26b</a> | Additional consent provisions for collection and use of participant data and biological specimens in ancillary studies, if applicable                                                                                              | 13: Ethical approval is needed in case of qualitative evaluation |
| Confidentiality                      | <a href="#">#27</a>  | How personal information about potential and enrolled participants will be collected, shared, and maintained in order to protect confidentiality before, during, and after the trial                                               | 8 + 12-13                                                        |

The PEP-CoV protocol: a PEP flute-selfcare randomised controlled trial to prevent respiratory deterioration and hospitalisation in SARS-CoV-2 infected individuals with Covid-19 symptoms

|                                                                                              |                                             |                      |                                                                                                                                                                                                                                                                                     |                                                                                   |
|----------------------------------------------------------------------------------------------|---------------------------------------------|----------------------|-------------------------------------------------------------------------------------------------------------------------------------------------------------------------------------------------------------------------------------------------------------------------------------|-----------------------------------------------------------------------------------|
| 1<br>2<br>3<br>4<br>5<br>6<br>7<br>8<br>9<br>10                                              | Declaration of interests                    | <a href="#">#28</a>  | Financial and other competing interests for principal investigators for the overall trial and each study site                                                                                                                                                                       | 7 + 15                                                                            |
| 11<br>12<br>13<br>14<br>15<br>16<br>17<br>18<br>19<br>20                                     | Data access                                 | <a href="#">#29</a>  | Statement of who will have access to the final trial dataset, and disclosure of contractual agreements that limit such access for investigators                                                                                                                                     | 7 + 15: The trial is initiated and sponsored by the research institution          |
| 21<br>22<br>23<br>24<br>25<br>26<br>27<br>28<br>29<br>30                                     | Ancillary and post trial care               | <a href="#">#30</a>  | Provisions, if any, for ancillary and post-trial care, and for compensation to those who suffer harm from trial participation                                                                                                                                                       | 12-15: The trial has ethical approval and insurance via the research organisation |
| 31<br>32<br>33<br>34<br>35<br>36<br>37<br>38<br>39<br>40<br>41<br>42<br>43<br>44<br>45<br>46 | Dissemination policy: trial results         | <a href="#">#31a</a> | Plans for investigators and sponsor to communicate trial results to participants, healthcare professionals, the public, and other relevant groups (eg, via publication, reporting in results databases, or other data sharing arrangements), including any publication restrictions | 2 + 12-15                                                                         |
| 47<br>48<br>49<br>50<br>51<br>52                                                             | Dissemination policy: authorship            | <a href="#">#31b</a> | Authorship eligibility guidelines and any intended use of professional writers                                                                                                                                                                                                      | 15                                                                                |
| 53<br>54<br>55<br>56<br>57<br>58<br>59<br>60                                                 | Dissemination policy: reproducible research | <a href="#">#31c</a> | Plans, if any, for granting public access to the full protocol, participant-level dataset, and statistical code                                                                                                                                                                     | n/a: Documents in Danish and public access is not planned                         |

The PEP-CoV protocol: a PEP flute-selfcare randomised controlled trial to prevent respiratory deterioration and hospitalisation in SARS-CoV-2 infected individuals with Covid-19 symptoms

## Appendices

|                            |                     |                                                                                                                                                                                                |                                             |
|----------------------------|---------------------|------------------------------------------------------------------------------------------------------------------------------------------------------------------------------------------------|---------------------------------------------|
| Informed consent materials | <a href="#">#32</a> | Model consent form and other related documentation given to participants and authorised surrogates                                                                                             | Documentation in Danish; supplementary file |
| Biological specimens       | <a href="#">#33</a> | Plans for collection, laboratory evaluation, and storage of biological specimens for genetic or molecular analysis in the current trial and for future use in ancillary studies, if applicable | n/a: No specimens are collected             |

### Notes:

- 17b: n/a: Open-label trial with no blinding
- 20a: 11-12: A statistical analysis plan will be amended the protocol
- 20b: Will be described in the statistical analysis plan
- 20c: Will be described in the statistical analysis plan
- 24: 7 + 12: The trial is approved
- 26b: 14: Ethical approval is needed in case of qualitative evaluation
- 29: 7 + 15: The trial is initiated and sponsored by the research institution
- 30: 12-15: The trial has ethical approval and insurance via the research organisation
- 31c: n/a: Documents in Danish and public access is not planned
- 32: n/a: Documentation in Danish; not suitable for international publication

The PEP-CoV protocol: a PEP flute-selfcare randomised controlled trial to prevent respiratory deterioration and hospitalisation in SARS-CoV-2 infected individuals with Covid-19 symptoms

- 33: n/a: No specimens are collected The SPIRIT Explanation and Elaboration paper is distributed under the terms of the Creative Commons Attribution License CC-BY-NC. This checklist was completed on 17. February 2021 using <https://www.goodreports.org/>, a tool made by the [EQUATOR Network](#) in collaboration with [Penelope.ai](#)

For peer review only
